# Supplementary material for: Anti-Neuroinflammatory Components from Clausena lenis Drake
Source: MDPI journal article supplement (doi:10.3390/molecules27061971), 2022-03-18
Supplement: s1 [file s1]

## SUPPLEMENTARY MATERIAL

### **Anti-neuroinflammatory components from *Clausena lenis* Drake**

Si-Si Zhu, Yi-Fan Zhang, Meng Ding, Ke-Wu Zeng, Peng-Fei Tu, Yong Jiang\*

*State Key Laboratory of Natural and Biomimetic Drugs, School of Pharmaceutical  
Sciences, Peking University, Beijing 100191, People's Republic of China*

---

\* Corresponding author.  
E-mail address: yongjiang@bjmu.edu.cn. (Y. Jiang).

## Contents

### For compound 1

**Figure S1.** HR-ESI-MS of **1**.

**Figure S2.** UV spectrum of **1** in MeOH.

**Figure S3.** IR spectrum of **1**.

**Figure S4.**  $^1\text{H}$  NMR (500 MHz) spectrum of **1** in  $\text{CDCl}_3$ .

**Figure S5.**  $^{13}\text{C}$  NMR (125 MHz) spectrum of **1** in  $\text{CDCl}_3$ .

**Figure S6.**  $^1\text{H}$ - $^1\text{H}$  COSY (500 MHz) spectrum of **1** in  $\text{CDCl}_3$ .

**Figure S7.** HSQC (500 MHz) spectrum of **1** in  $\text{CDCl}_3$ .

**Figure S8.** HMBC (500 MHz) spectrum of **1** in  $\text{CDCl}_3$ .

**Figure S9.**  $^1\text{H}$  NMR (500 MHz) spectrum of **1** in  $\text{C}_5\text{D}_5\text{N}$ .

**Figure S10.**  $^{13}\text{C}$  NMR (125 MHz) spectrum of **1** in  $\text{C}_5\text{D}_5\text{N}$ .

**Figure S11.**  $^1\text{H}$ - $^1\text{H}$  COSY (500 MHz) spectrum of **1** in  $\text{C}_5\text{D}_5\text{N}$ .

**Figure S12.** HSQC (500 MHz) spectrum of **1** in  $\text{C}_5\text{D}_5\text{N}$ .

**Figure S13.** HMBC (500 MHz) spectrum of **1** in  $\text{C}_5\text{D}_5\text{N}$ .

**Figure S14.** Chiral HPLC separation of racemate **1**.

**Figure S15.** LC/MS chromatograms of detection of **1** in the crude extract of *C. lenis*.

### For compound 2

**Figure S16.** HR-ESI-MS of **2**.

**Figure S17.** UV spectrum of **2** in MeOH.

**Figure S18.** IR spectrum of **2**.

**Figure S19.**  $^1\text{H}$  NMR (500 MHz) spectrum of **2** in  $\text{CDCl}_3$ .

**Figure S20.**  $^{13}\text{C}$  NMR (125 MHz) spectrum of **2** in  $\text{CDCl}_3$ .

**Figure S21.**  $^1\text{H}$ - $^1\text{H}$  COSY (500 MHz) spectrum of **2** in  $\text{CDCl}_3$ .

**Figure S22.** HSQC (500 MHz) spectrum of **2** in  $\text{CDCl}_3$ .

**Figure S23.** HMBC (500 MHz) spectrum of **2** in  $\text{CDCl}_3$ .

### For compound 3

**Figure S24.** HR-ESI-MS of **3**.

**Figure S25.** UV spectrum of **3** in MeOH.

**Figure S26.** IR spectrum of **3**.

**Figure S27.**  $^1\text{H}$  NMR (500 MHz) spectrum of **3** in  $\text{CDCl}_3$ .

**Figure S28.**  $^{13}\text{C}$  NMR (125 MHz) spectrum of **3** in  $\text{CDCl}_3$ .

**Figure S29.**  $^1\text{H}$ - $^1\text{H}$  COSY (500 MHz) spectrum of **3** in  $\text{CDCl}_3$ .

**Figure S30.** HSQC (500 MHz) spectrum of **3** in  $\text{CDCl}_3$ .

**Figure S31.** HMBC (500 MHz) spectrum of **3** in  $\text{CDCl}_3$ .

### For compound 4

**Figure S32.** HR-ESI-MS of **4**.

**Figure S33.** UV spectrum of **4** in MeOH.

**Figure S34.** IR spectrum of **4**.

**Figure S35.**  $^1\text{H}$  NMR (500 MHz) spectrum of **4** in MeOD.

**Figure S36.**  $^{13}\text{C}$  NMR (125 MHz) spectrum of **4** in MeOD.

**Figure S37.**  $^1\text{H}$ - $^1\text{H}$  COSY (500 MHz) spectrum of **4** in MeOD.

**Figure S38.** HSQC (500 MHz) spectrum of **4** in MeOD.

**Figure S39.** HMBC (500 MHz) spectrum of **4** in MeOD.

**Figure S40.** HPLC-UV (210 nm) chromatograms of the derivatives of D-glucose, L-glucose, and the hydrolysate of claulenoside A (**4**).

#### **For compound 5**

**Figure S41.** HR-ESI-MS of **5**.

**Figure S42.** UV spectrum of **5** in MeOH.

**Figure S43.** IR spectrum of **5**.

**Figure S44.**  $^1\text{H}$  NMR (500 MHz) spectrum of **5** in  $\text{CDCl}_3$ .

**Figure S45.**  $^{13}\text{C}$  NMR (125 MHz) spectrum of **5** in  $\text{CDCl}_3$ .

**Figure S46.**  $^1\text{H}$ - $^1\text{H}$  COSY (500 MHz) spectrum of **5** in  $\text{CDCl}_3$ .

**Figure S47.** HSQC (500 MHz) spectrum of **5** in  $\text{CDCl}_3$ .

**Figure S48.** HMBC (500 MHz) spectrum of **5** in  $\text{CDCl}_3$ .

#### **For compounds 6–38**

**Figure S49.** Chemical structures of compounds **6–38**.

**Figure S50.** ESI-MS of **22**.

**Figure S51.** Experimental and calculated ECD spectra of **22**.

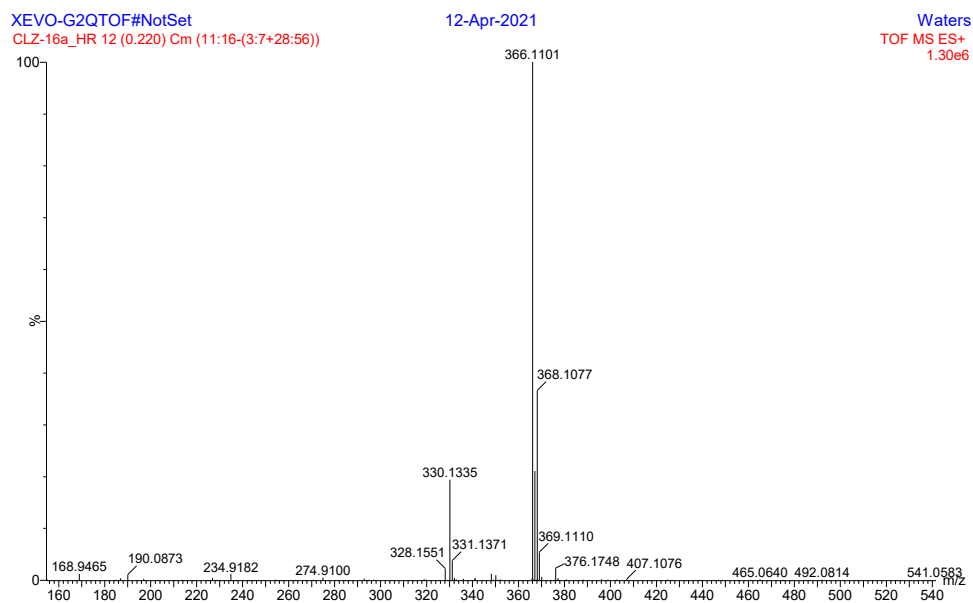

| Mass     | Calc. Mass | mDa  | PPM  | DBE | i-FIT | Norm  | Conf(%) | Formula                                            |
|----------|------------|------|------|-----|-------|-------|---------|----------------------------------------------------|
| 366.1101 | 366.1108   | -0.7 | -1.9 | 8.5 | 227.6 | 0.000 | 99.98   | C <sub>18</sub> H <sub>21</sub> NO <sub>5</sub> Cl |

**Figure S1.** HR-ESI-MS of **1**.

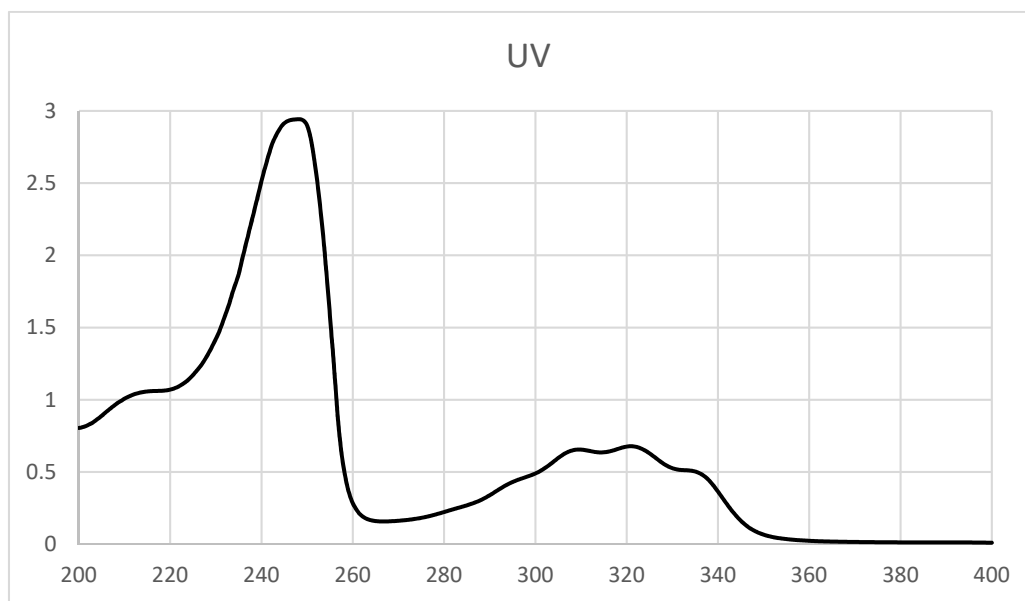

**Figure S2.** UV spectrum of **1** in MeOH.

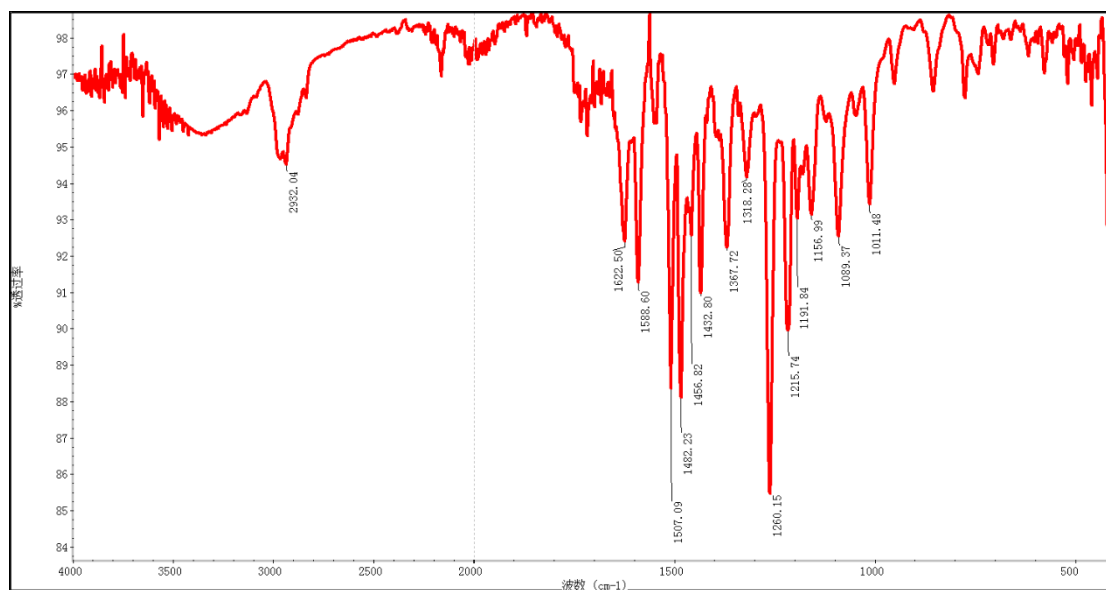

**Figure S3.** IR spectrum of **1**.

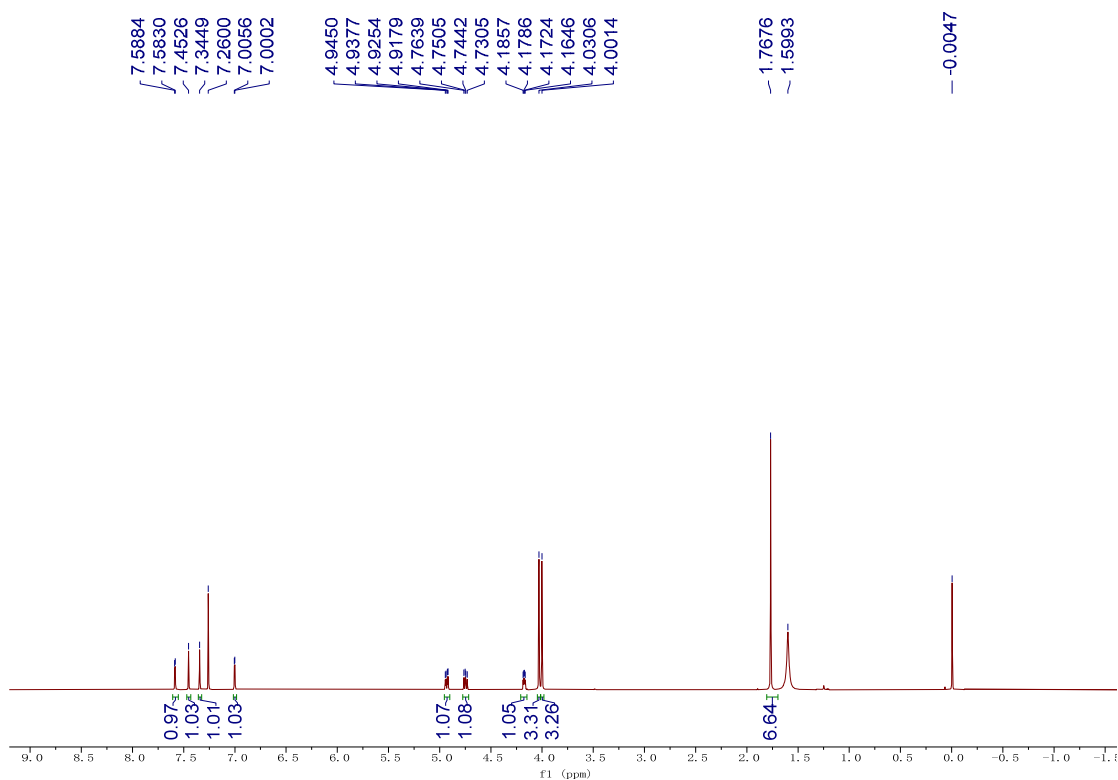

**Figure S4.** <sup>1</sup>H NMR (500 MHz) spectrum of **1** in CDCl<sub>3</sub>.

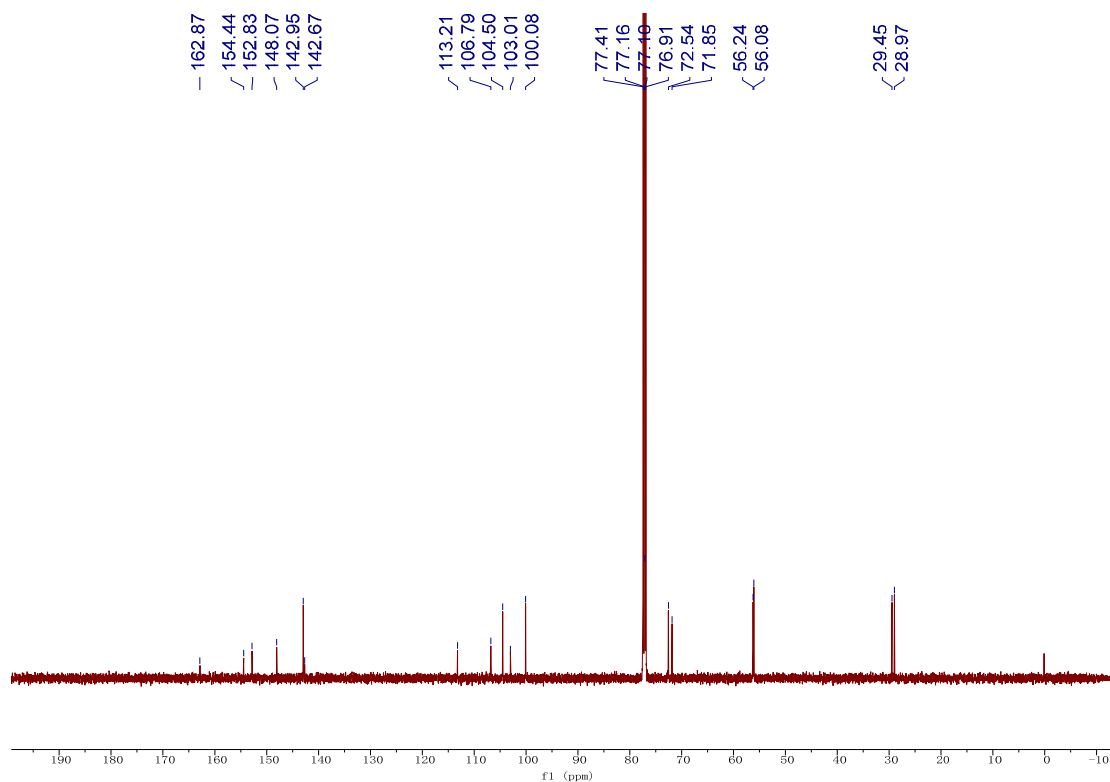

**Figure S5.**  $^{13}\text{C}$  NMR (125 MHz) spectrum of **1** in  $\text{CDCl}_3$ .

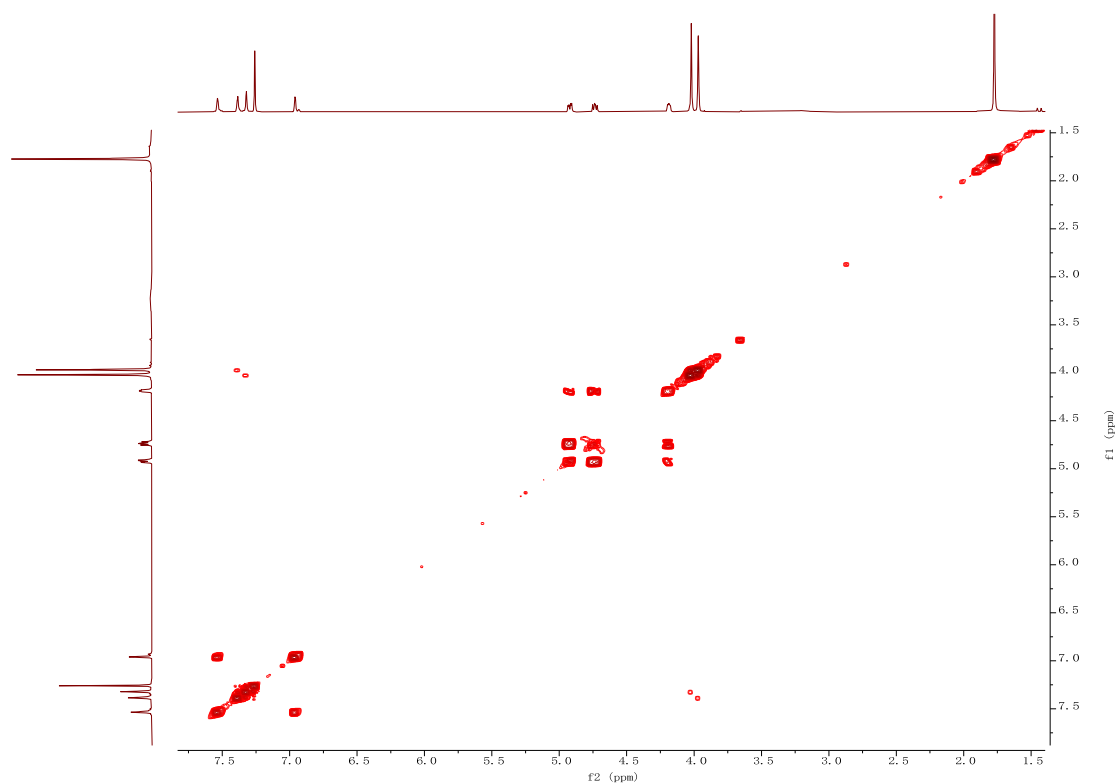

**Figure S6.**  $^1\text{H}$ - $^1\text{H}$  COSY (500 MHz) spectrum of **1** in  $\text{CDCl}_3$ .

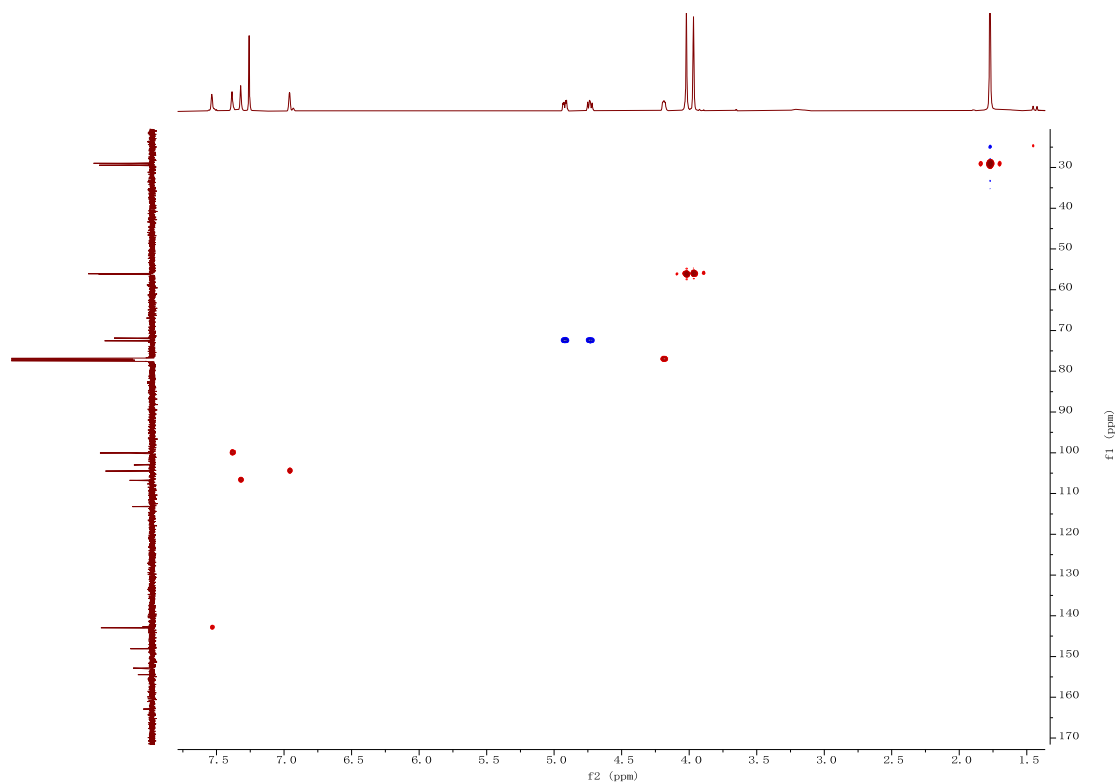

**Figure S7.** HSQC (500 MHz) spectrum of **1** in CDCl<sub>3</sub>.

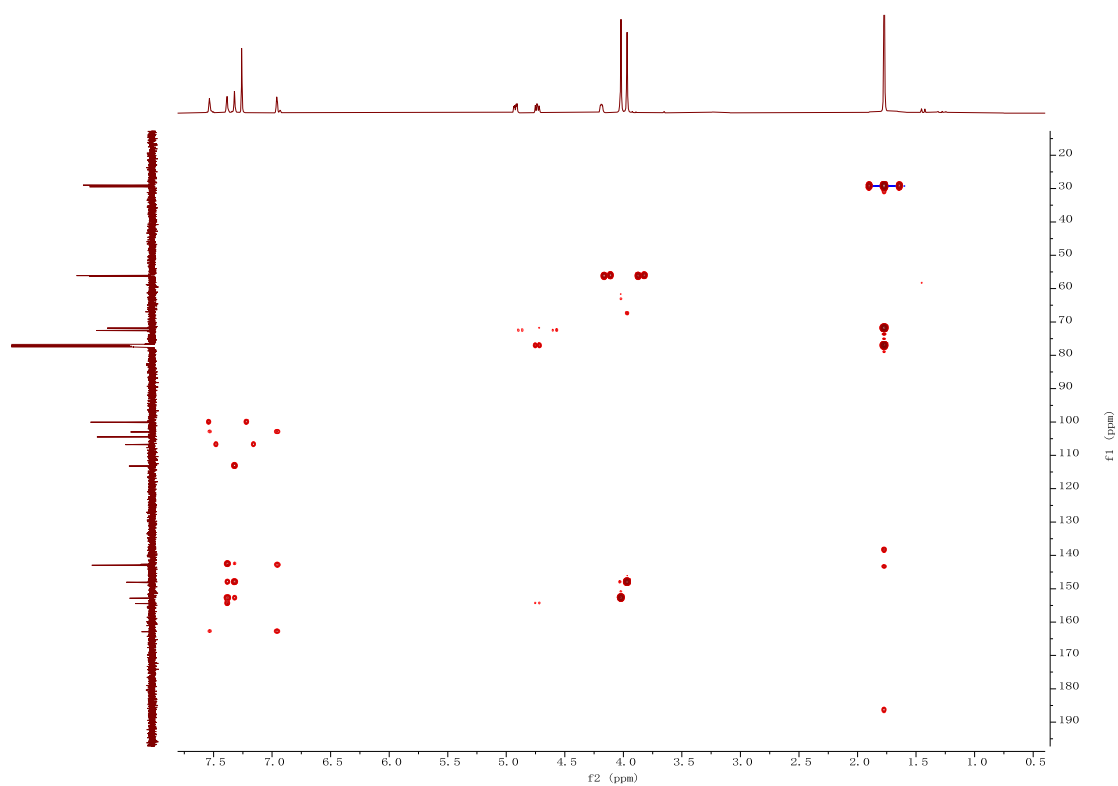

**Figure S8.** HMBC (500 MHz) spectrum of **1** in CDCl<sub>3</sub>.

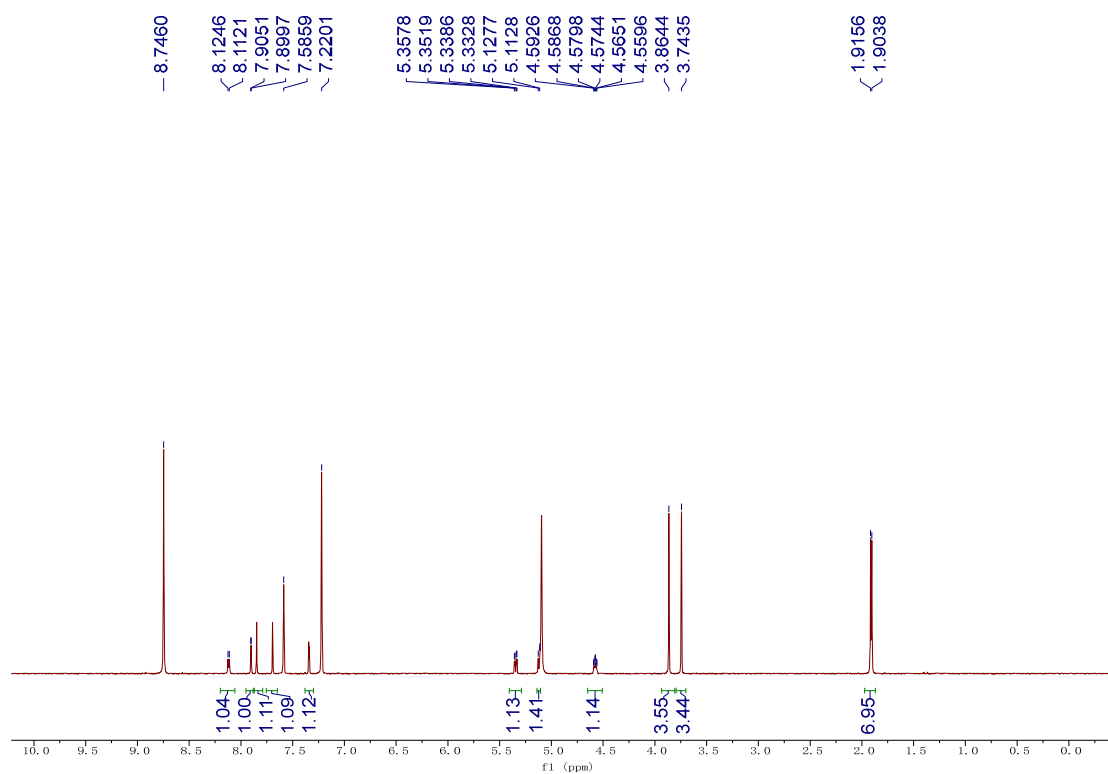

**Figure S9.** <sup>1</sup>H NMR (500 MHz) spectrum of **1** in C<sub>5</sub>D<sub>5</sub>N.

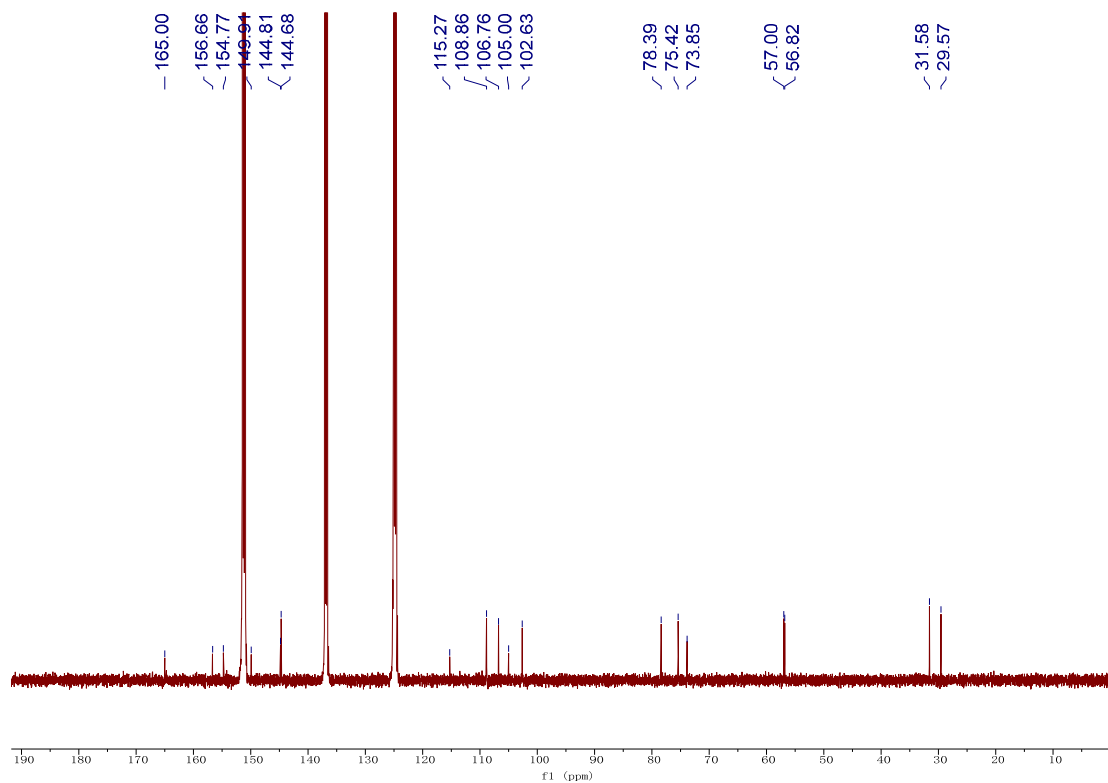

**Figure S10.** <sup>13</sup>C NMR (125 MHz) spectrum of **1** in C<sub>5</sub>D<sub>5</sub>N.



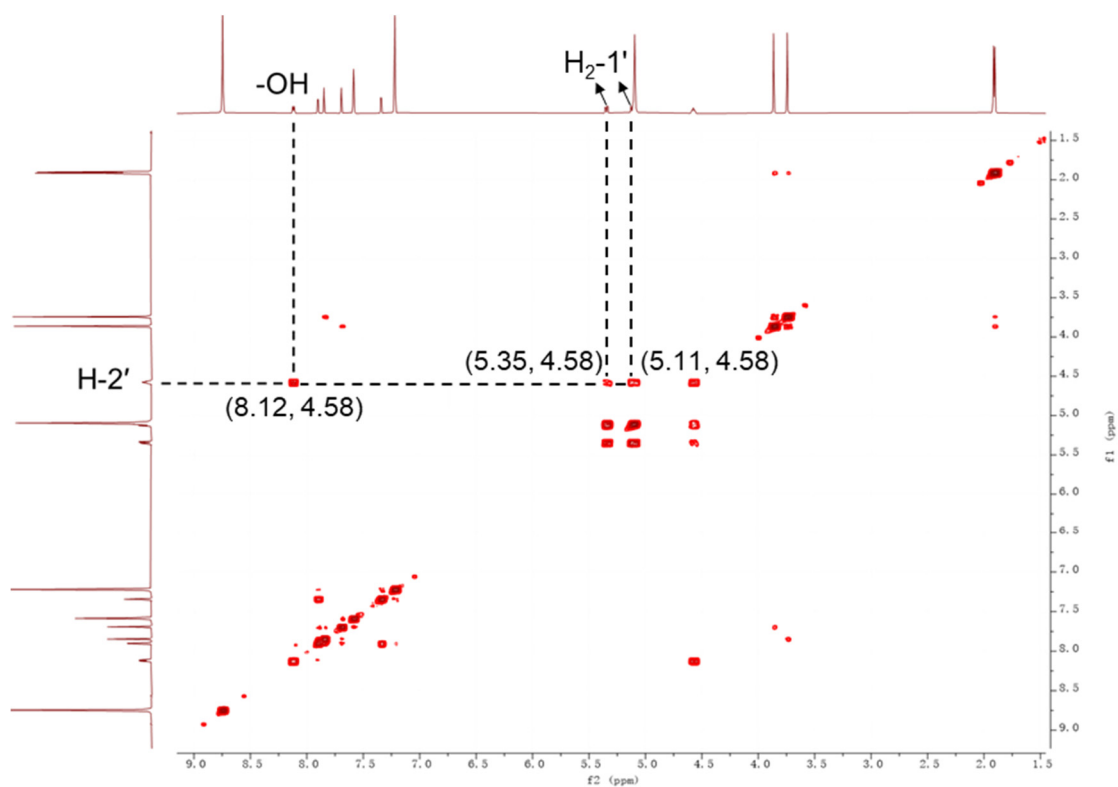

**Figure S11.**  $^1\text{H}$ - $^1\text{H}$  COSY (500 MHz) spectrum of **1** in  $\text{C}_5\text{D}_5\text{N}$ .

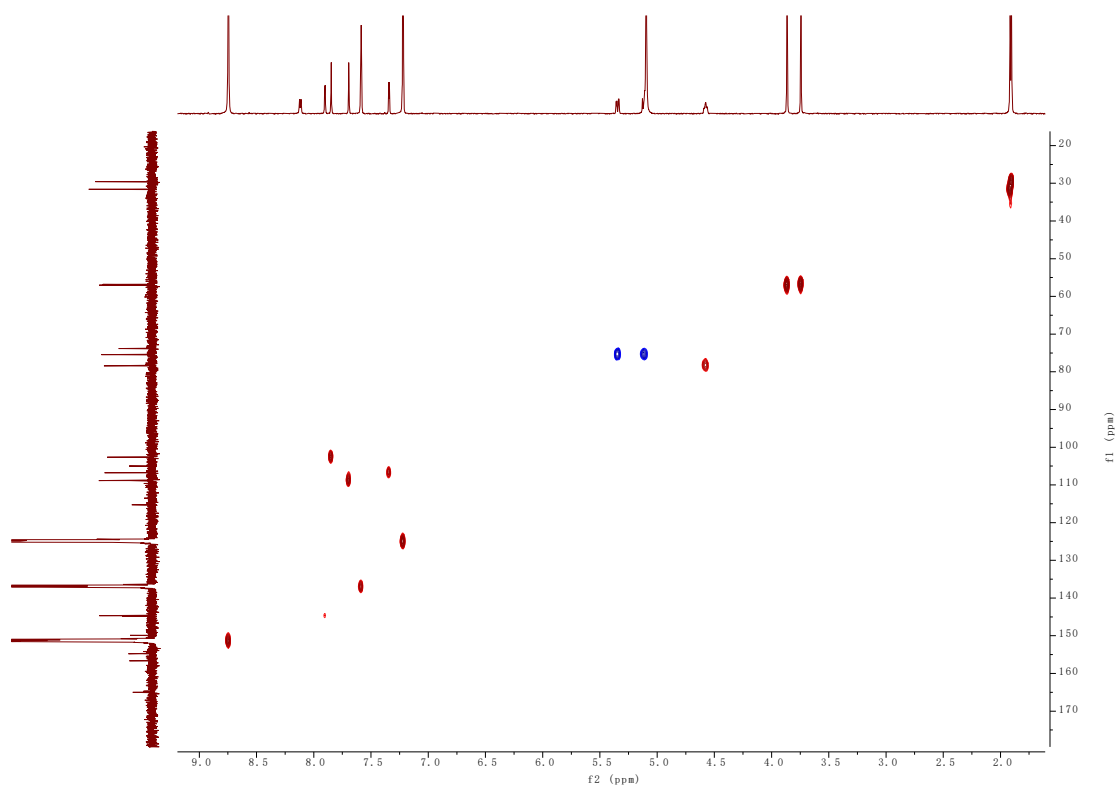

**Figure S12.** HSQC (500 MHz) spectrum of **1** in  $\text{C}_5\text{D}_5\text{N}$ .

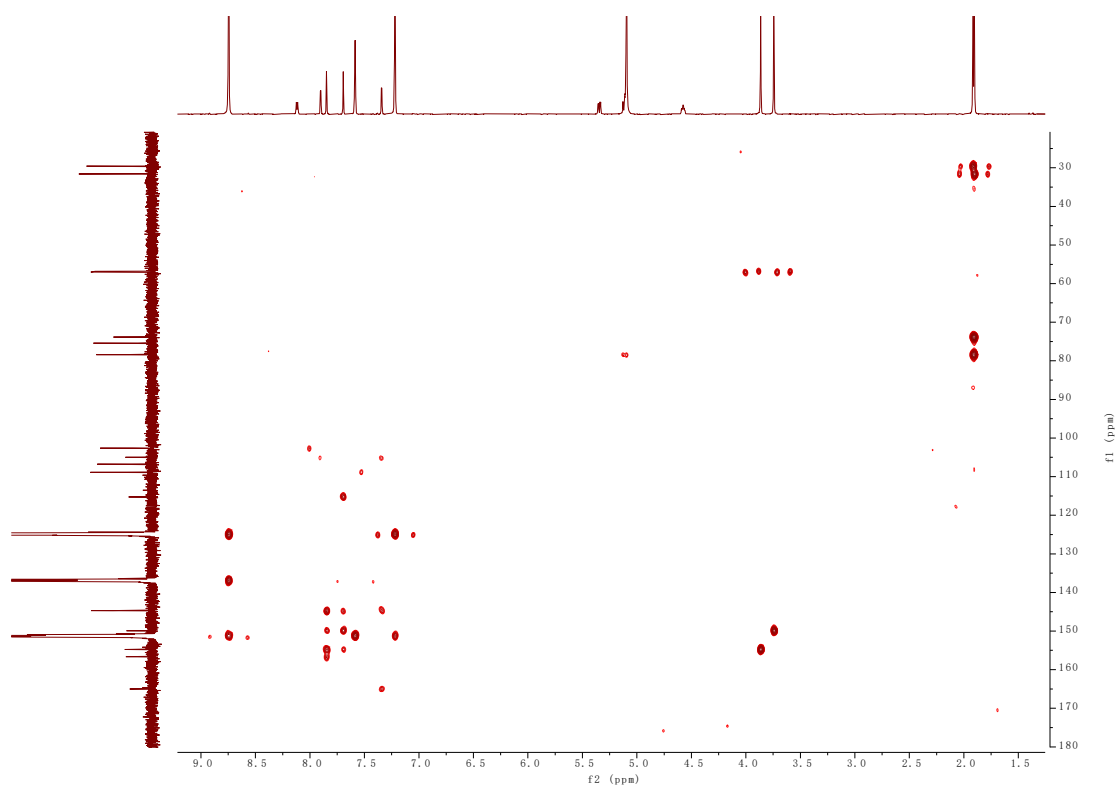

**Figure S13.** HMBC (500 MHz) spectrum of **1** in  $C_5D_5N$ .

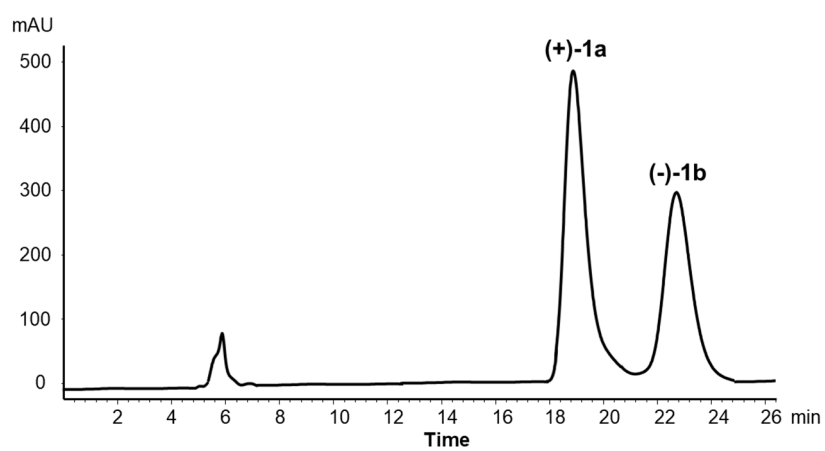

**Figure S14.** Chiral HPLC separation of racemate **1** (*n*-hexane/isopropanol, 85:15;  $T = 30\text{ }^{\circ}C$ ; flow rate: 3.0 mL/min; wavelength: 254 nm).

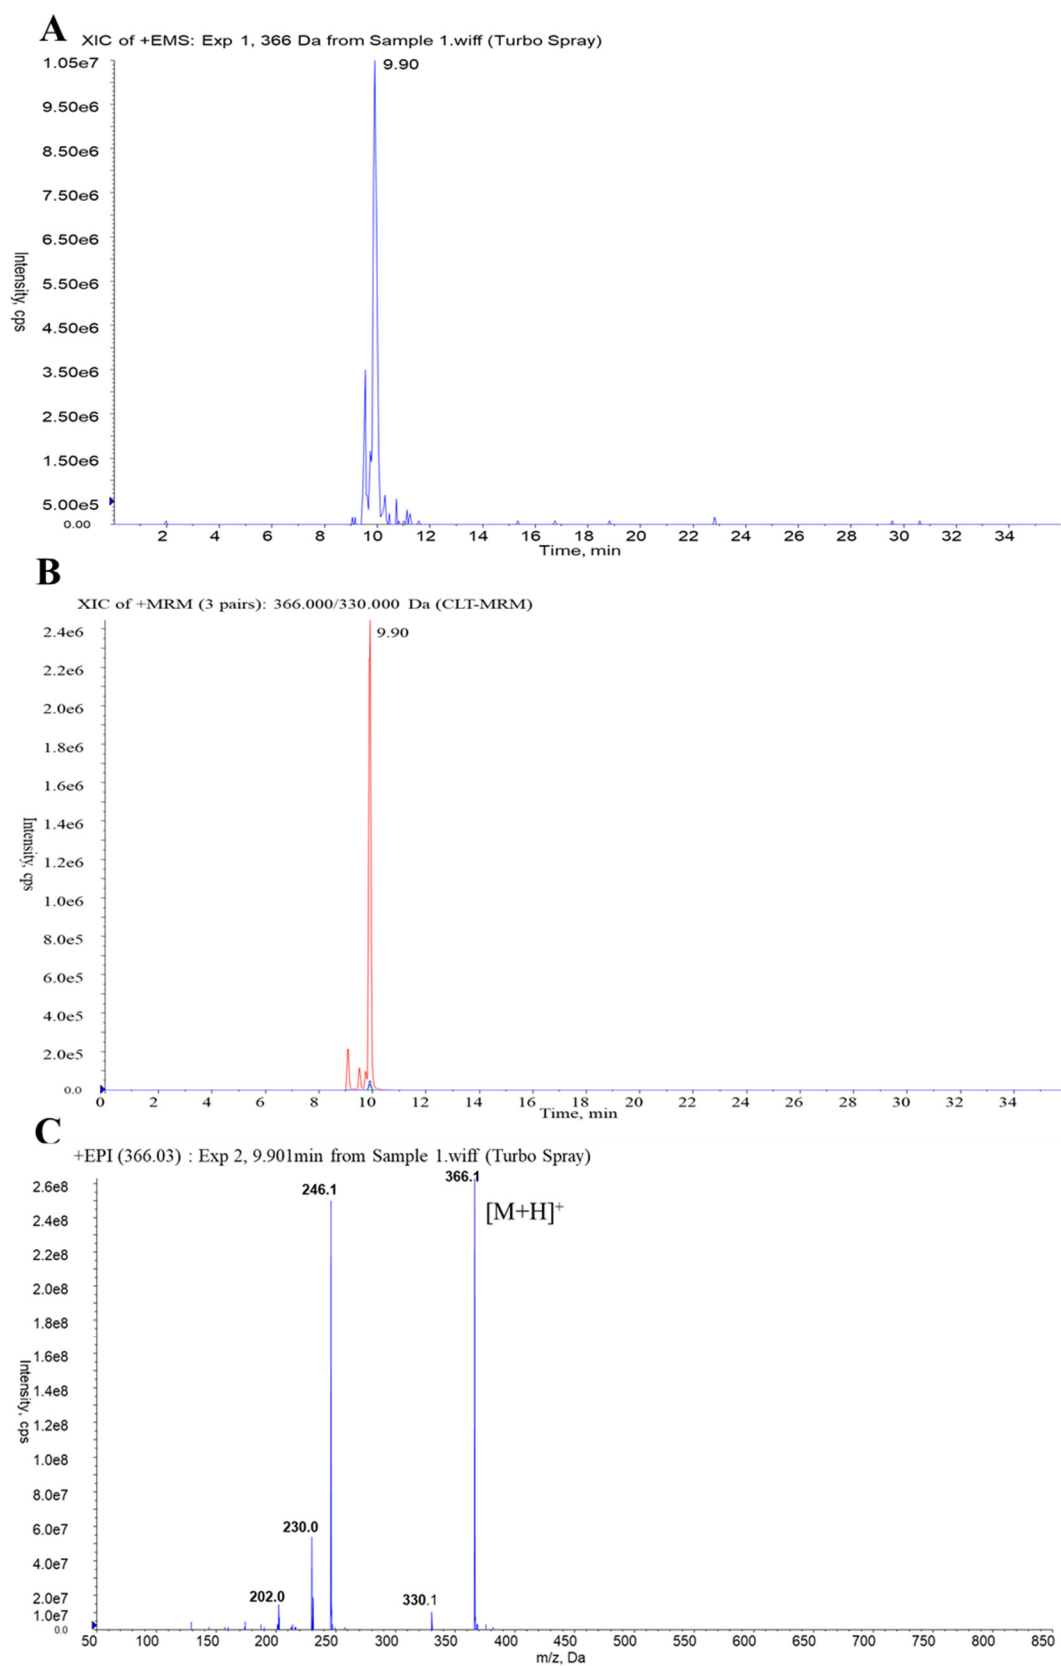

**Figure S15.** LC/MS chromatograms of detection of **1** in the crude extract of *C. lenis*. (A: EIC of **1** ( $m/z$  366); B: XIC of **1** ( $m/z$  366) from the crude extract of *C. lenis* under the MRM mode; C: The fragmentation behavior of **1** ( $m/z$  366).

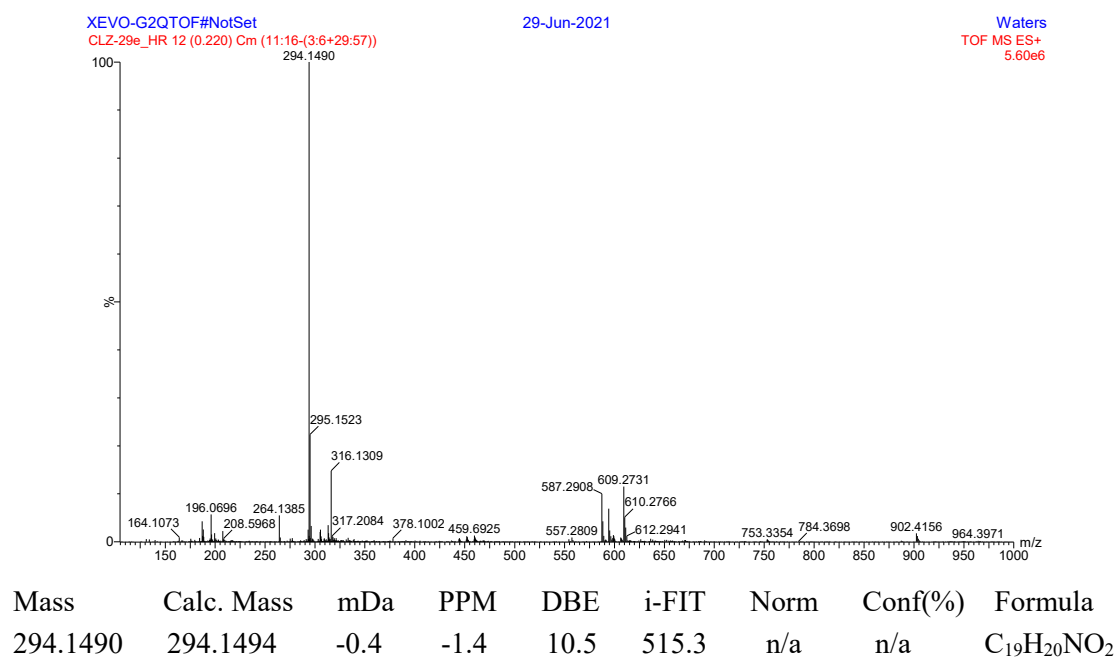

**Figure S16.** HR-ESI-MS of **2**.

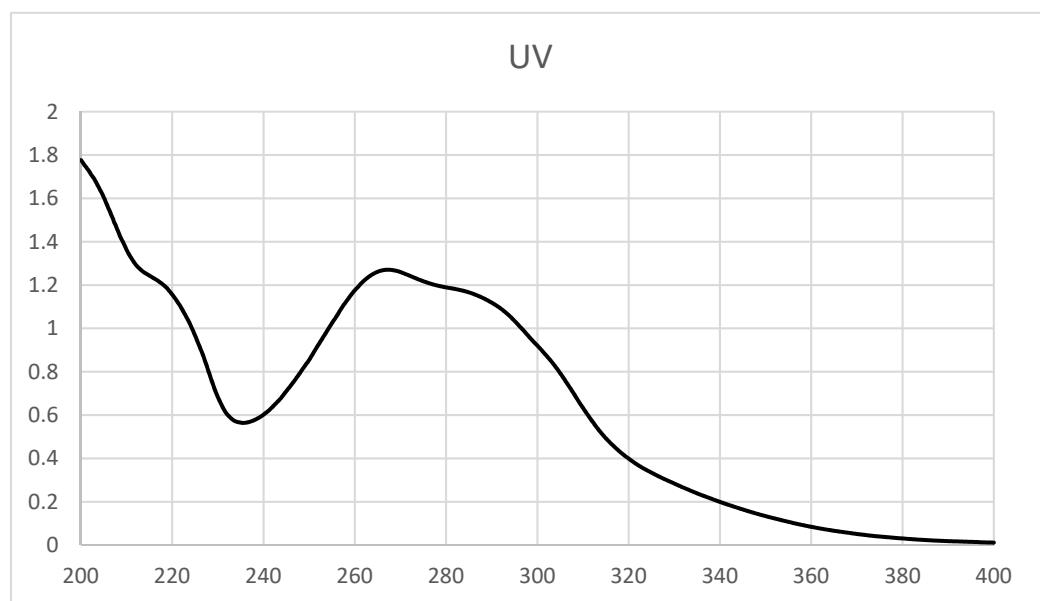

**Figure S17.** UV spectrum of **2** in MeOH.

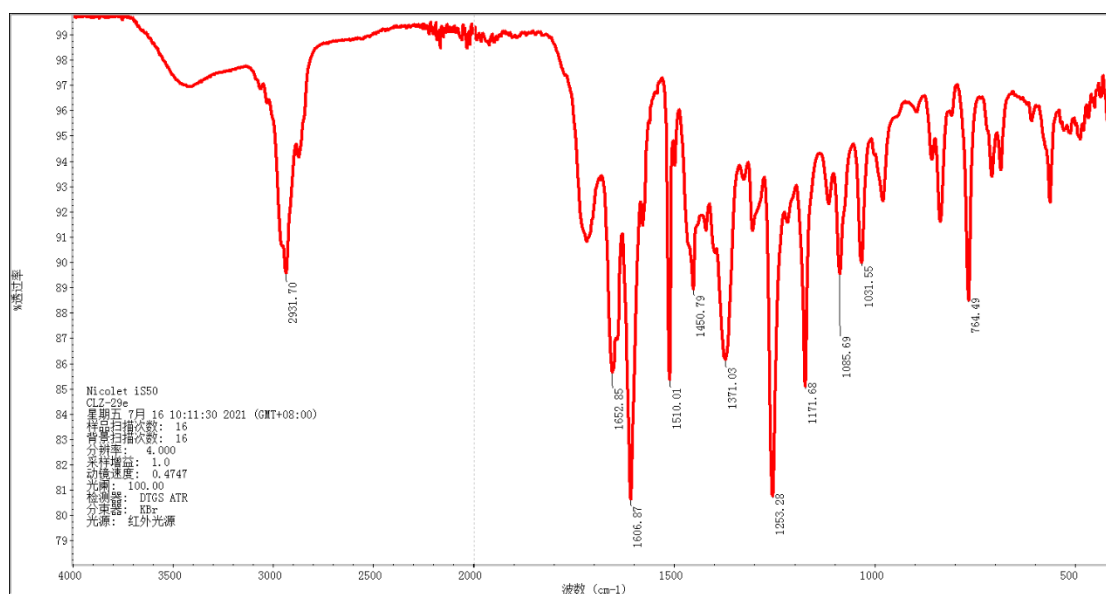

Figure S18. IR spectrum of **2**.

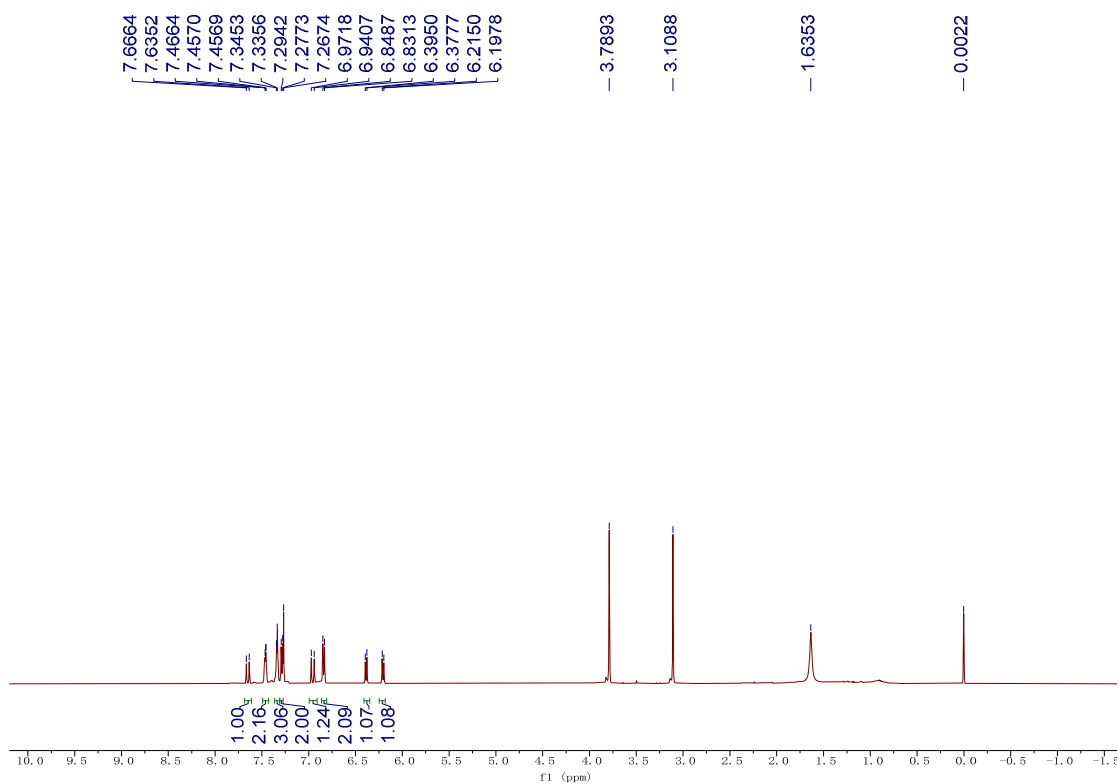

Figure S19. <sup>1</sup>H NMR (500 MHz) spectrum of **2** in CDCl<sub>3</sub>.

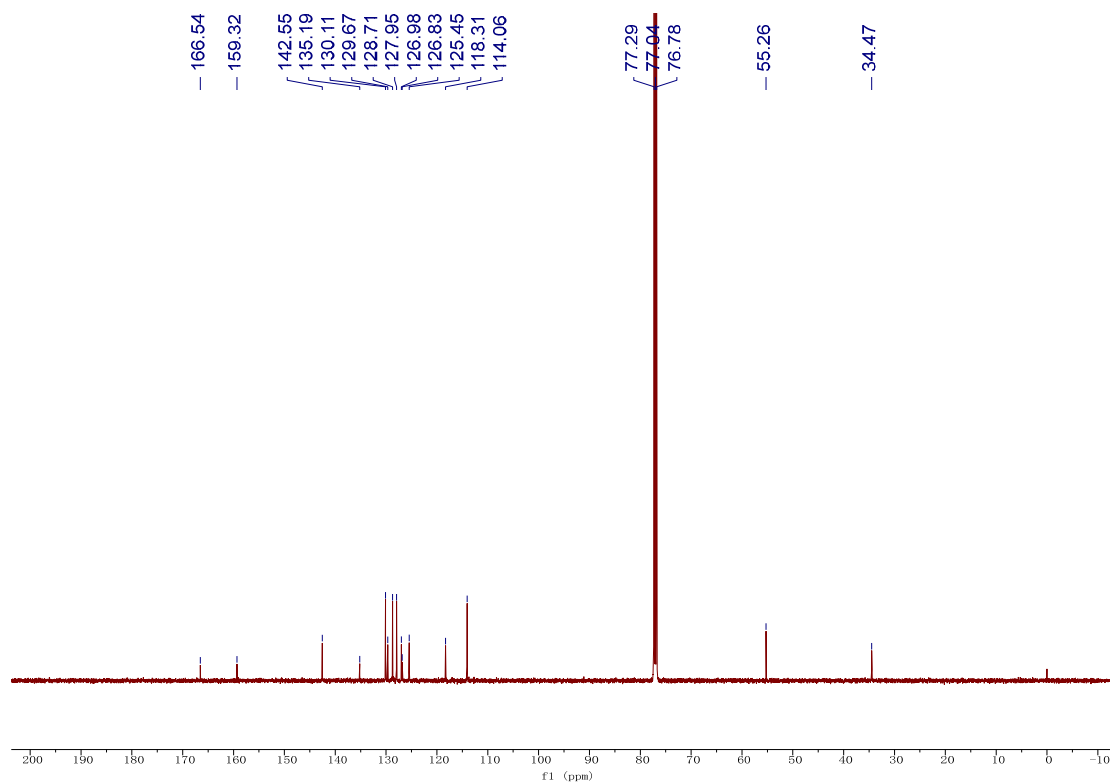

**Figure S20.**  $^{13}\text{C}$  NMR (125 MHz) spectrum of **2** in  $\text{CDCl}_3$ .

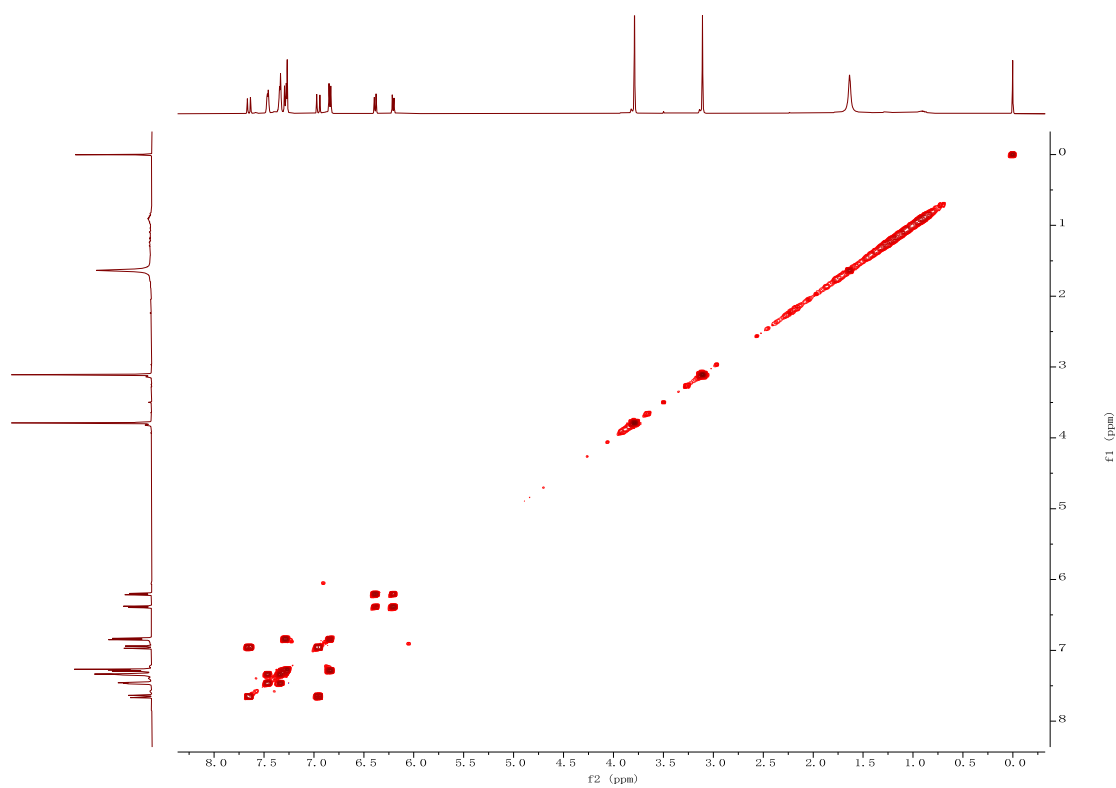

**Figure S21.**  $^1\text{H}$ - $^1\text{H}$  COSY (500 MHz) spectrum of **2** in  $\text{CDCl}_3$ .

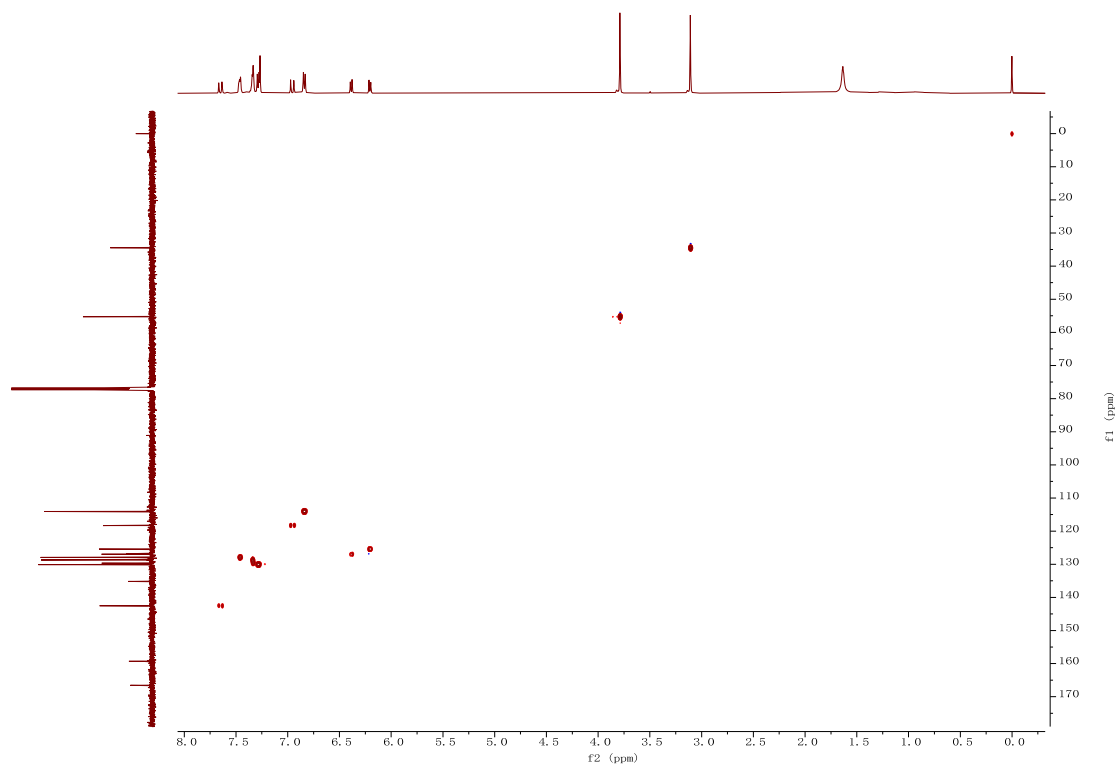

**Figure S22.** HSQC (500 MHz) spectrum of **2** in CDCl<sub>3</sub>.

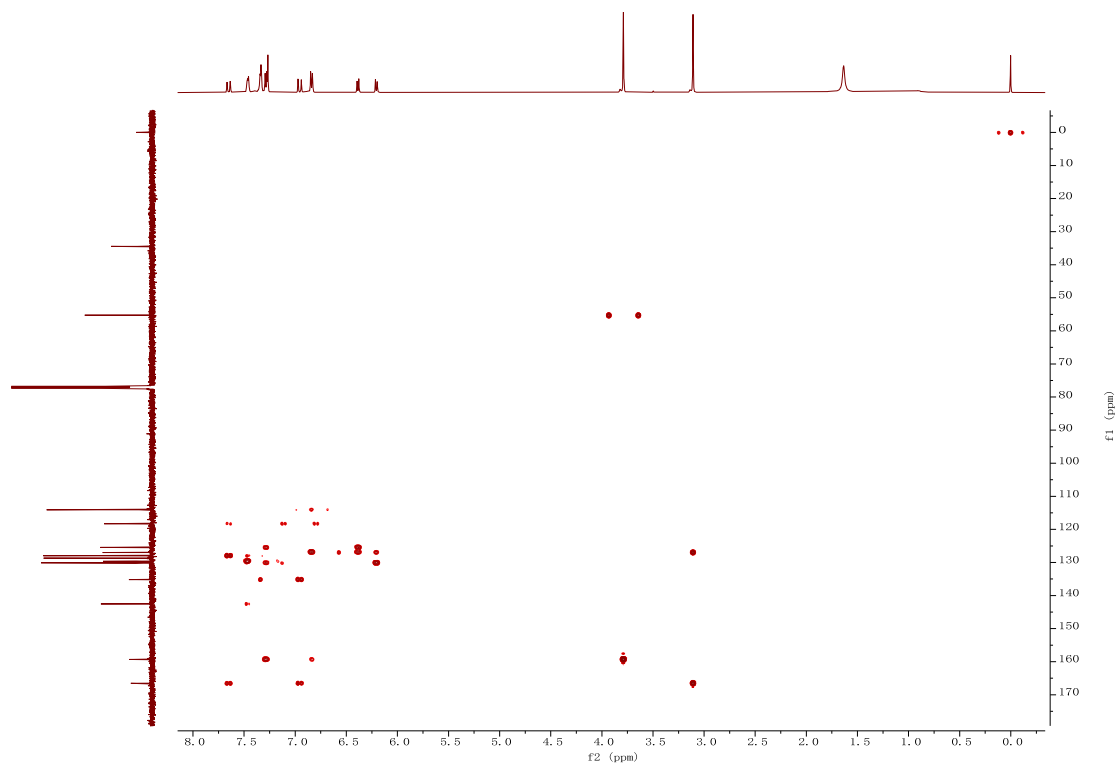

**Figure S23.** HMBC (500 MHz) spectrum of **2** in CDCl<sub>3</sub>.

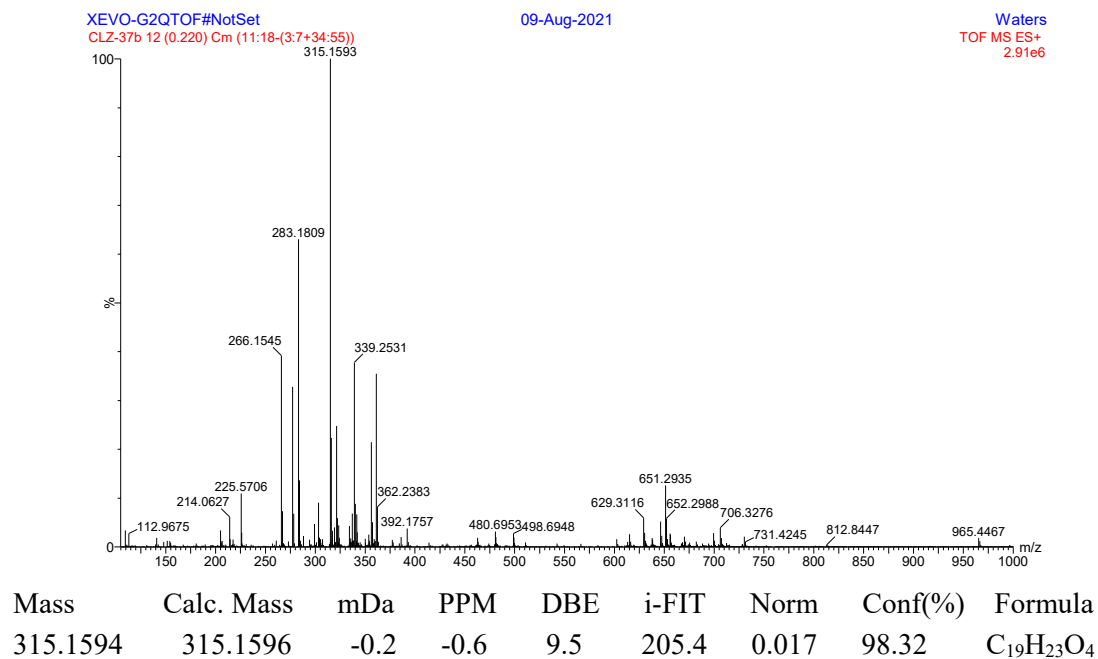

**Figure S24.** HR-ESI-MS of **3**.

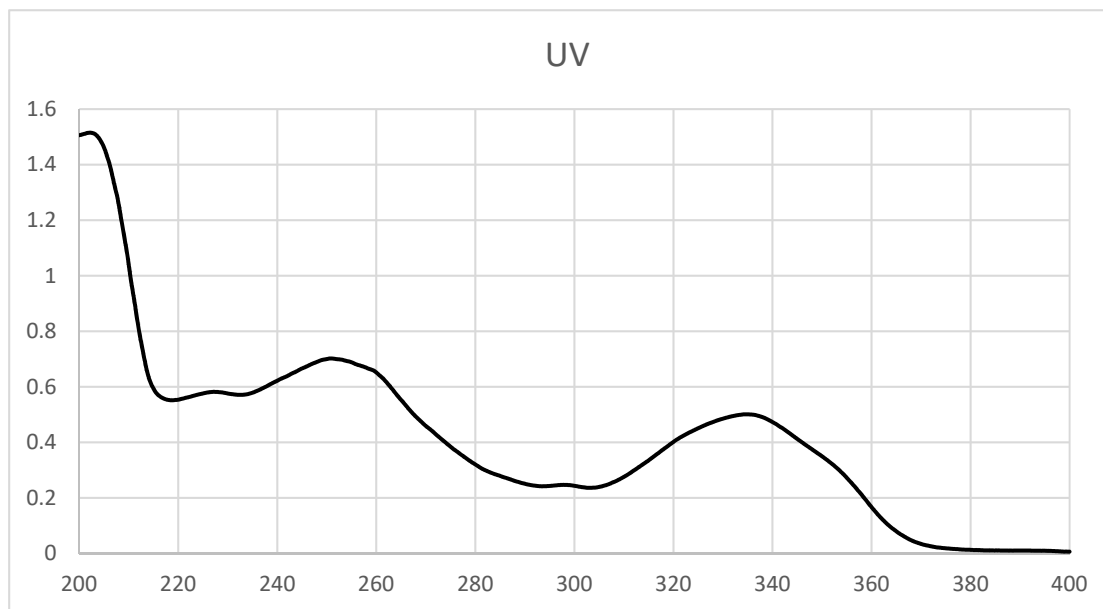

**Figure S25.** UV spectrum of **3** in MeOH.



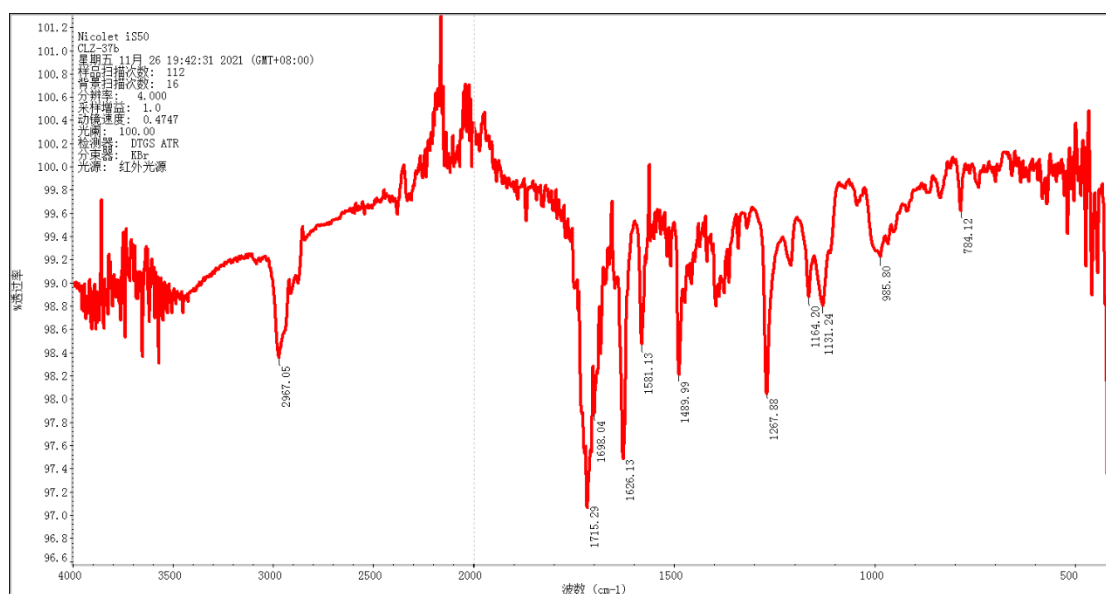

Figure S26. IR spectrum of **3**.

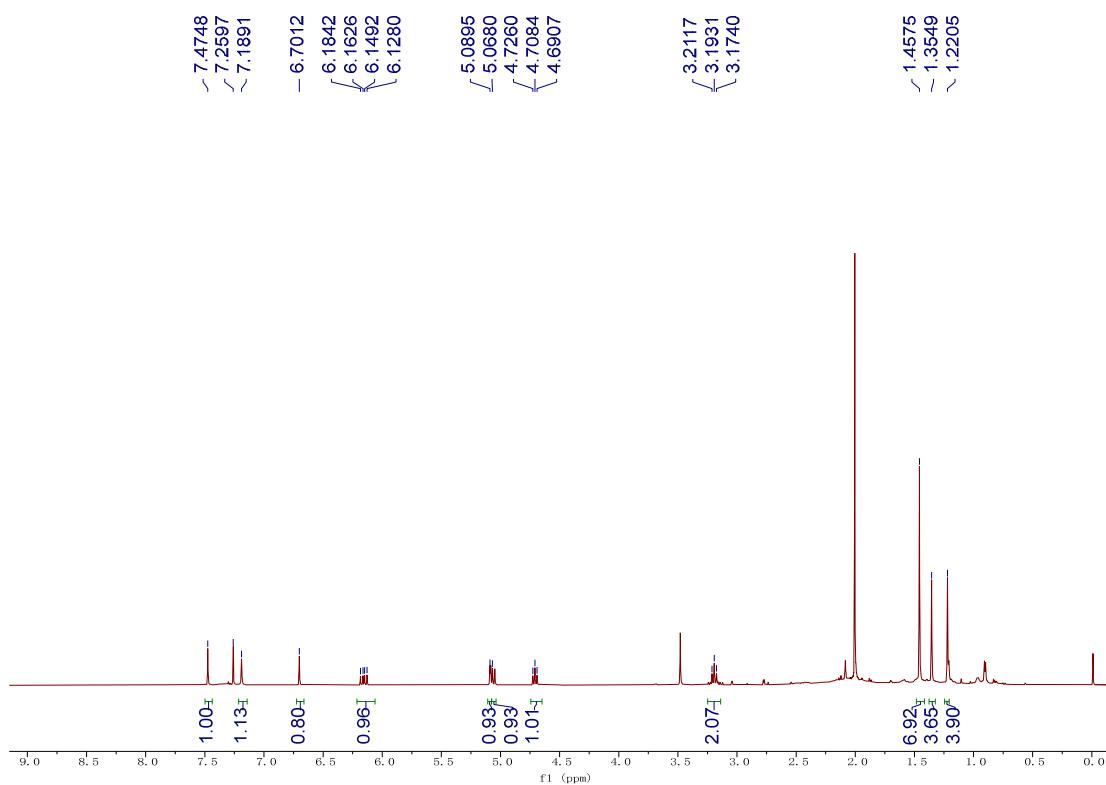

Figure S27.  $^1\text{H}$  NMR (500 MHz) spectrum of **3** in  $\text{CDCl}_3$ .

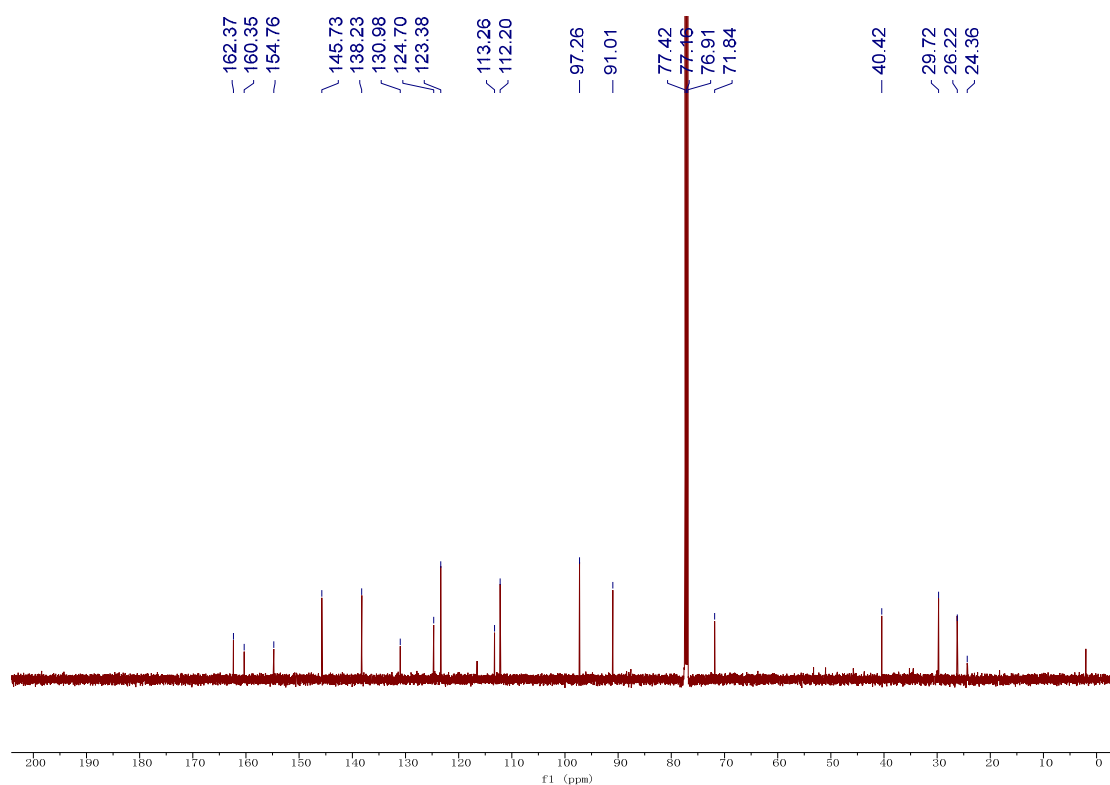

**Figure S28.**  $^{13}\text{C}$  NMR (125 MHz) spectrum of **3** in  $\text{CDCl}_3$ .

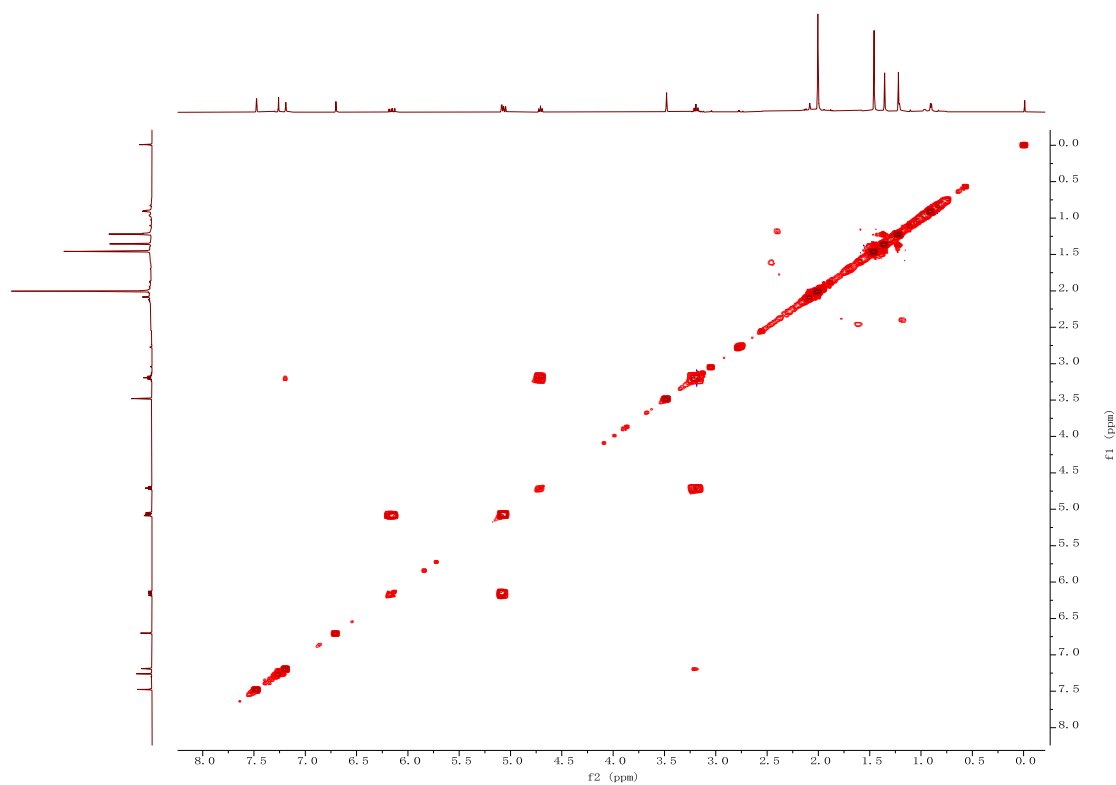

**Figure S29.**  $^1\text{H}$ - $^1\text{H}$  COSY (500 MHz) spectrum of **3** in  $\text{CDCl}_3$ .

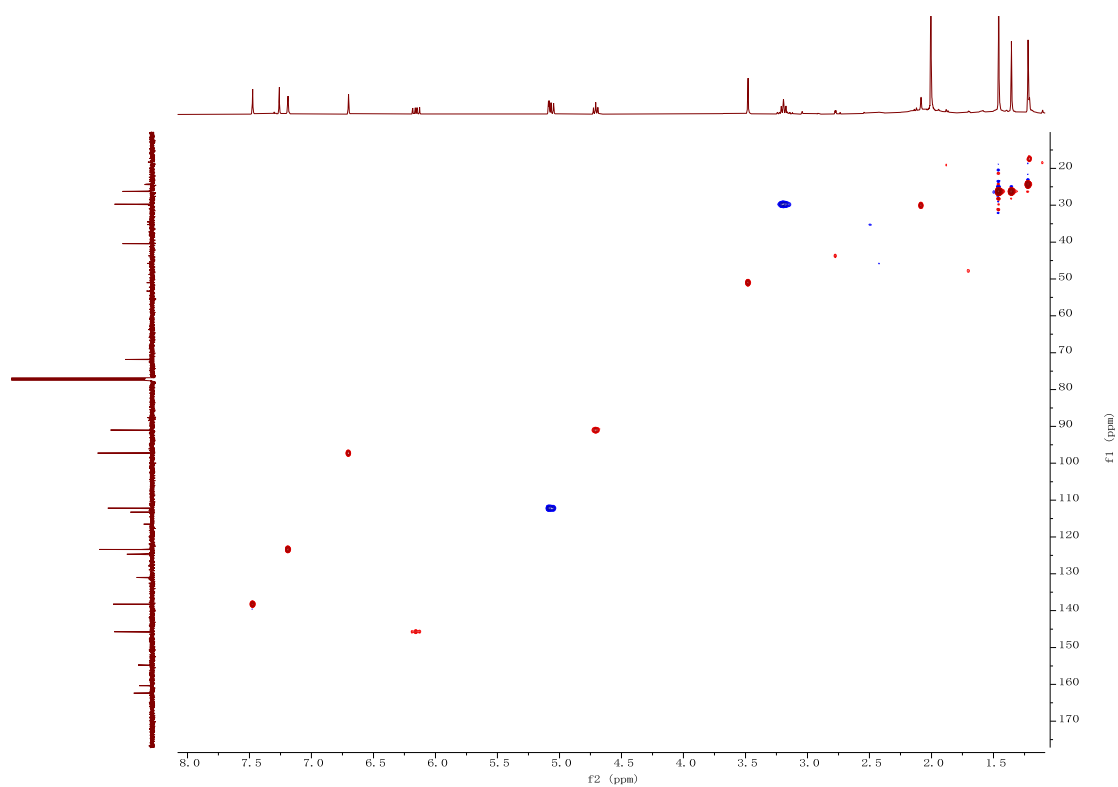

**Figure S30.** HSQC (500 MHz) spectrum of **3** in CDCl<sub>3</sub>.

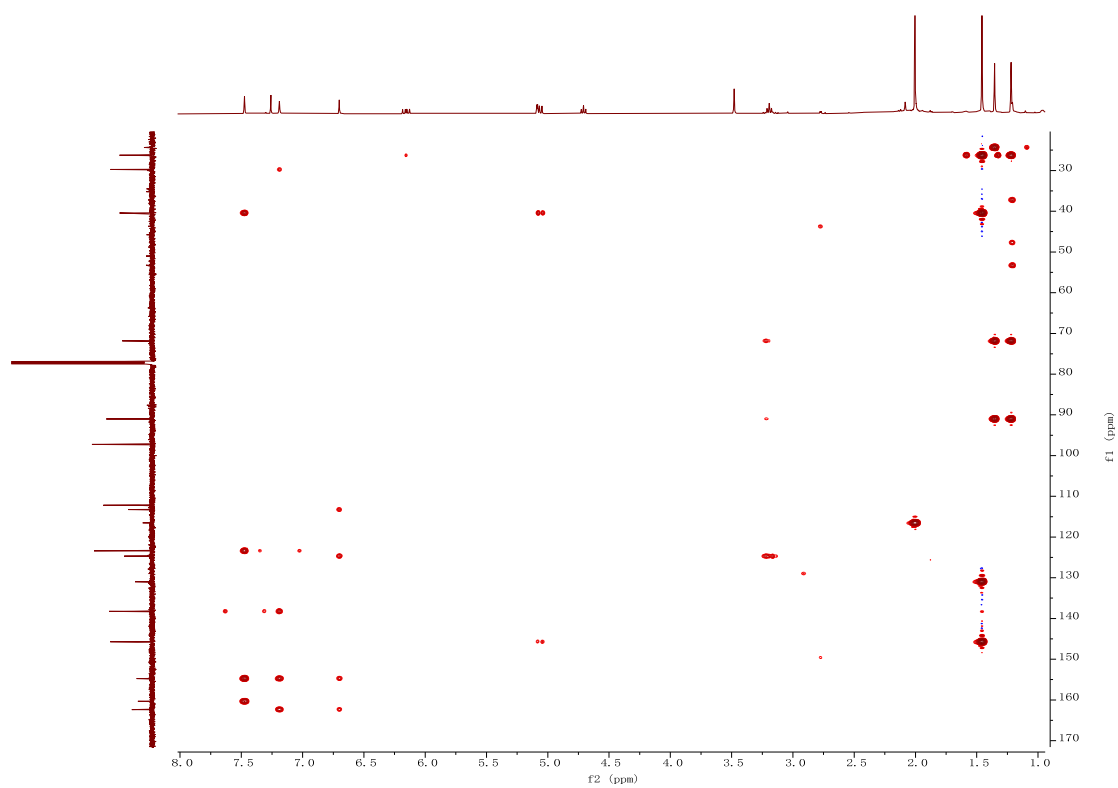

**Figure S31.** HMBC (500 MHz) spectrum of **3** in CDCl<sub>3</sub>.

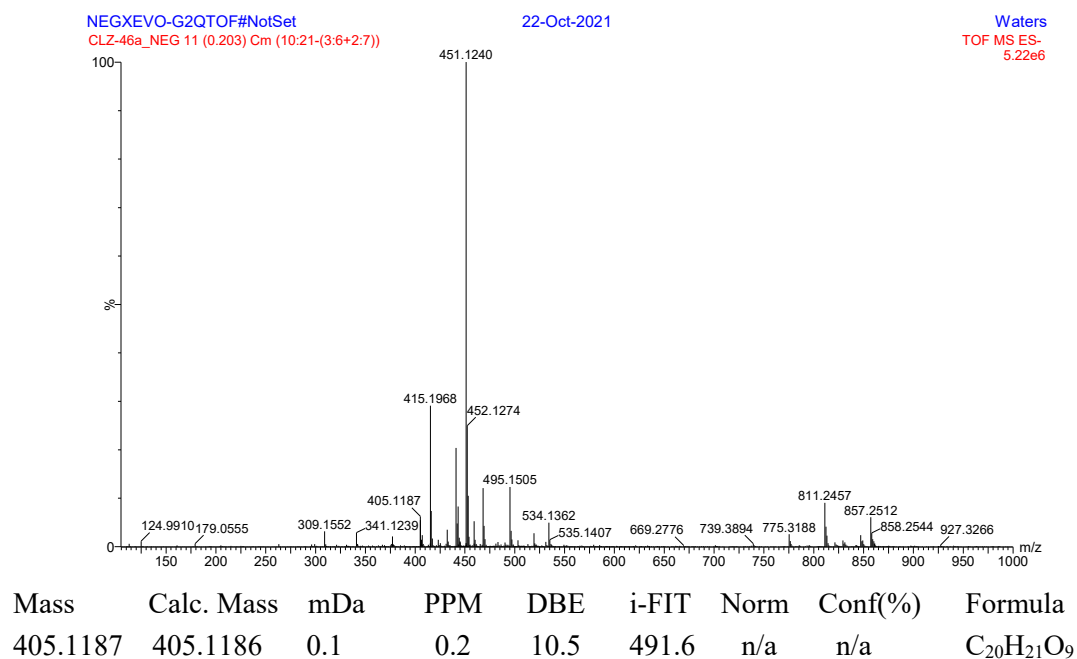

**Figure S32.** HR-ESI-MS of **4**.

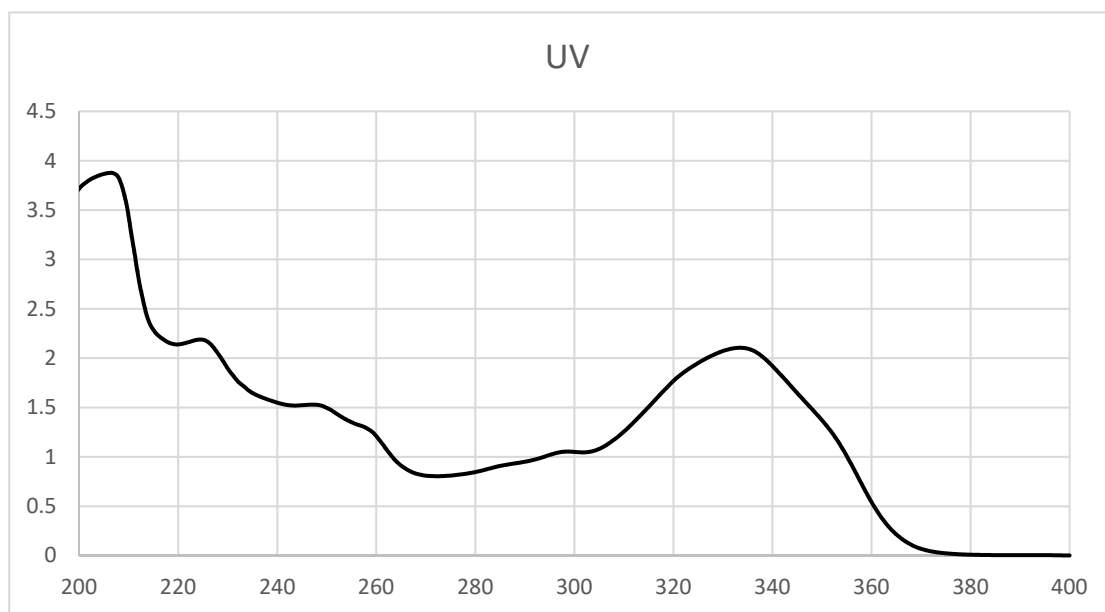

**Figure S33.** UV spectrum of **4** in MeOH.

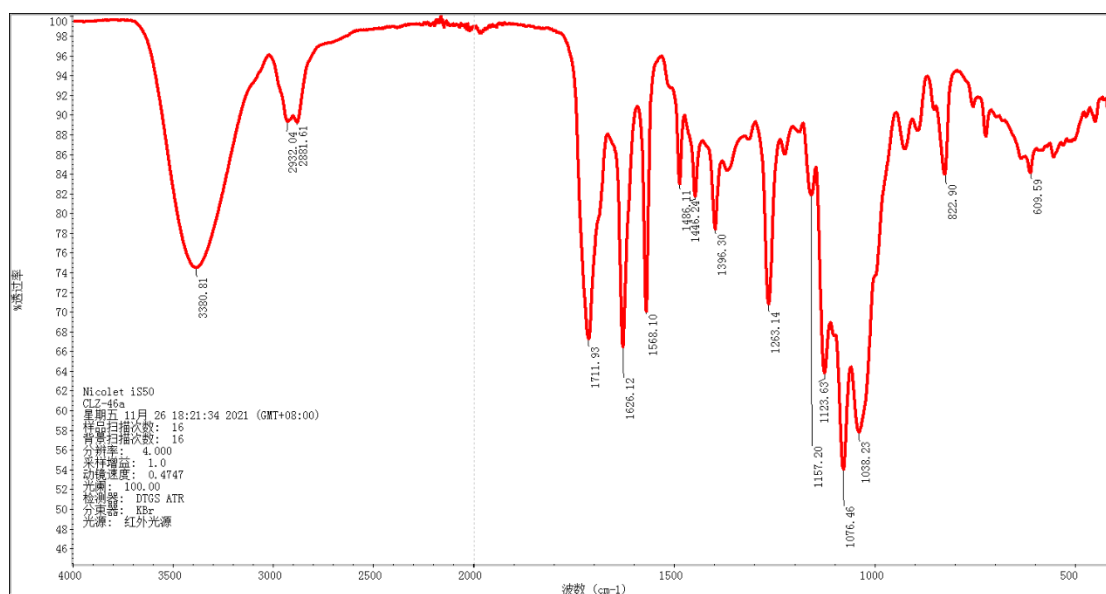

Figure S34. IR spectrum of 4.

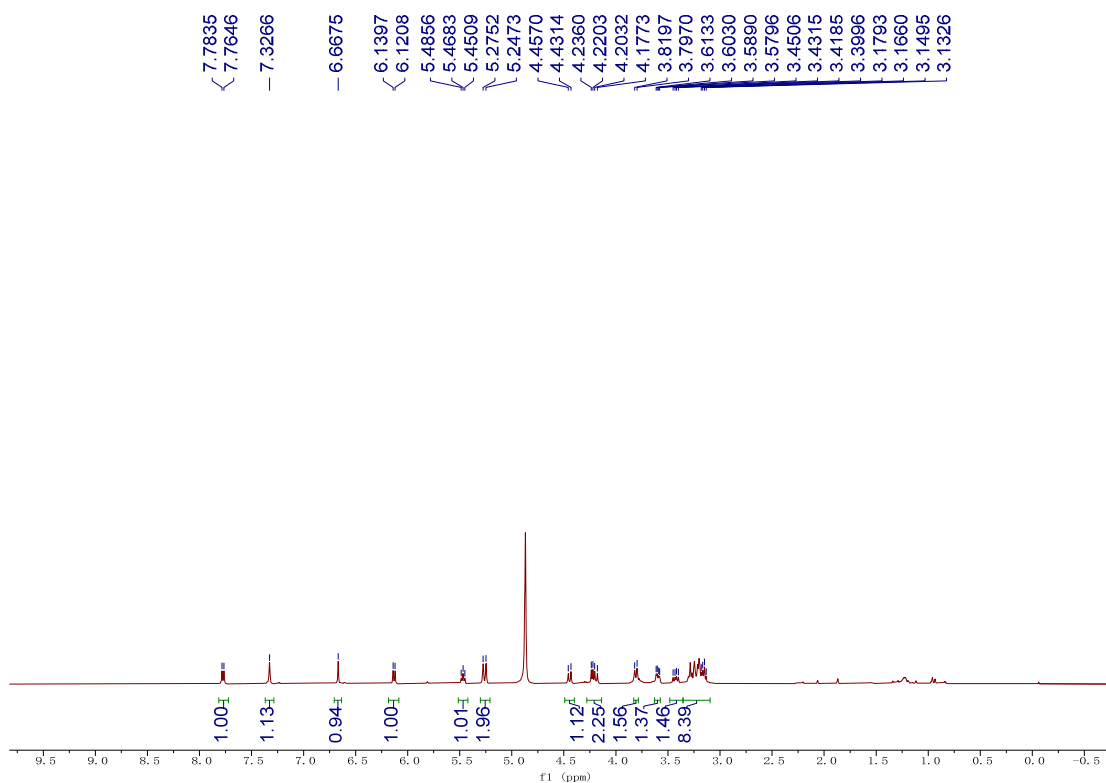

Figure S35. <sup>1</sup>H NMR (500 MHz) spectrum of 4 in MeOD.

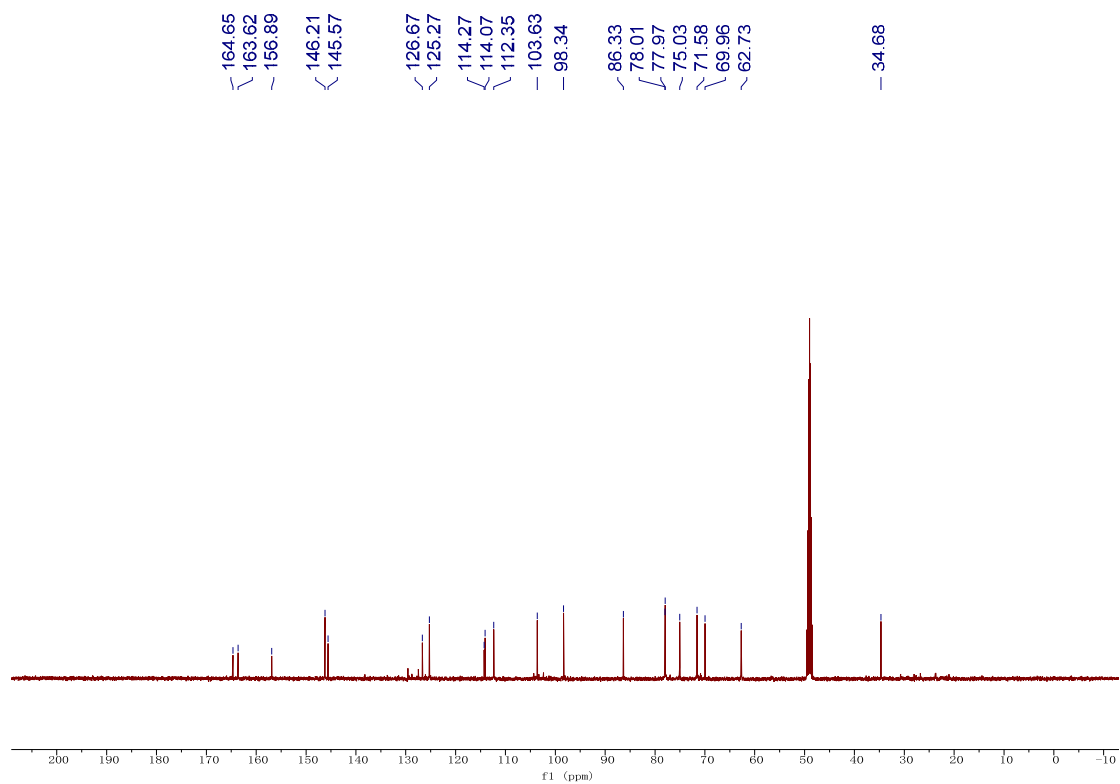

**Figure S36.**  $^{13}\text{C}$  NMR (125 MHz) spectrum of **4** in MeOD.

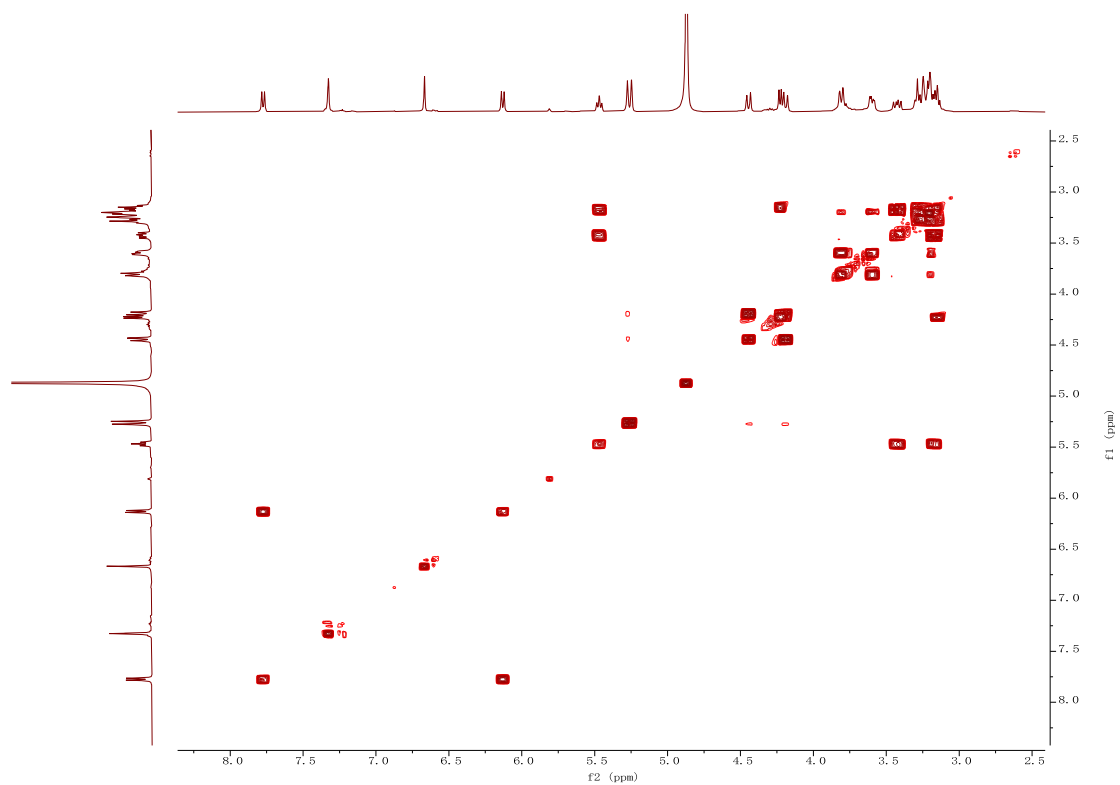

**Figure S37.**  $^1\text{H}$ - $^1\text{H}$  COSY (500 MHz) spectrum of **4** in MeOD.

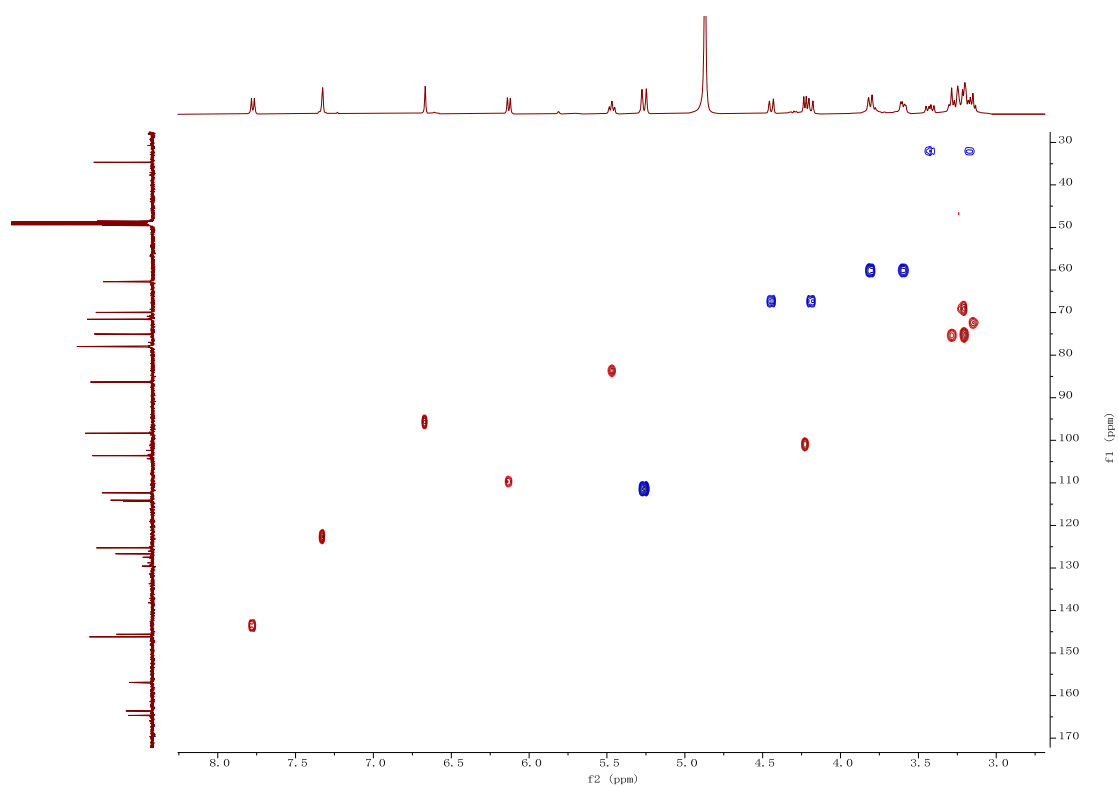

**Figure S38.** HSQC (500 MHz) spectrum of **4** in MeOD.

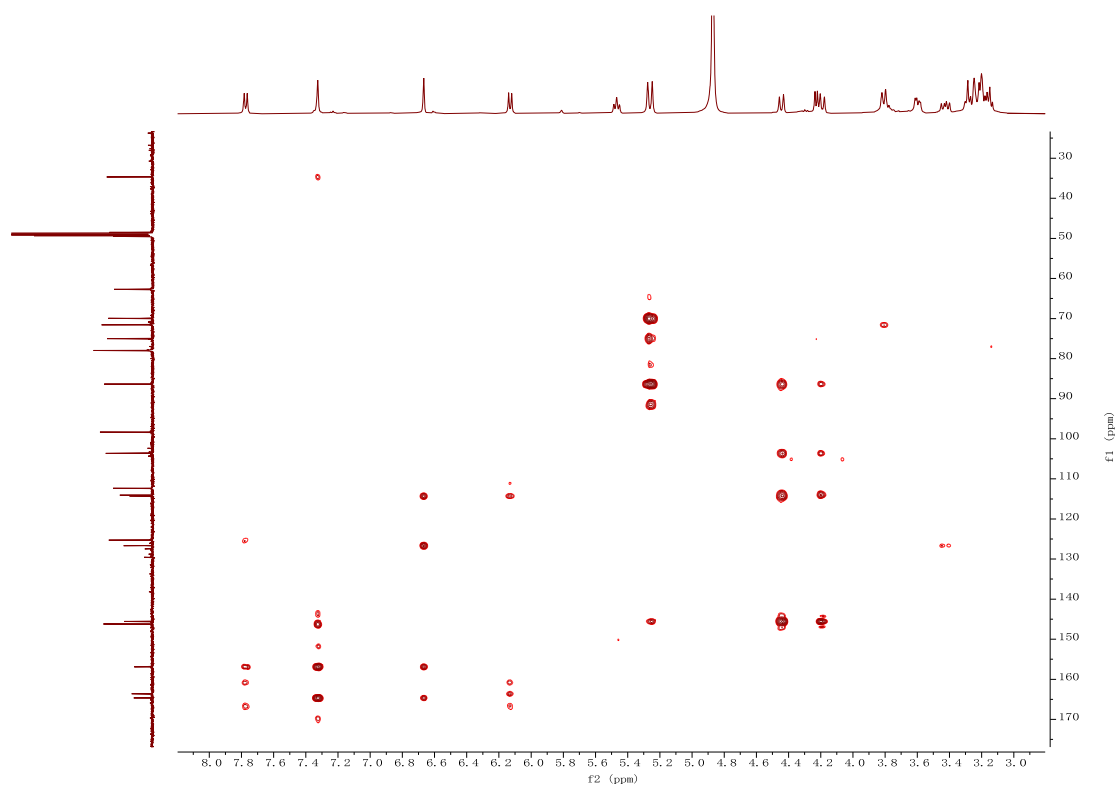

**Figure S39.** HMBC (500 MHz) spectrum of **4** in MeOD.

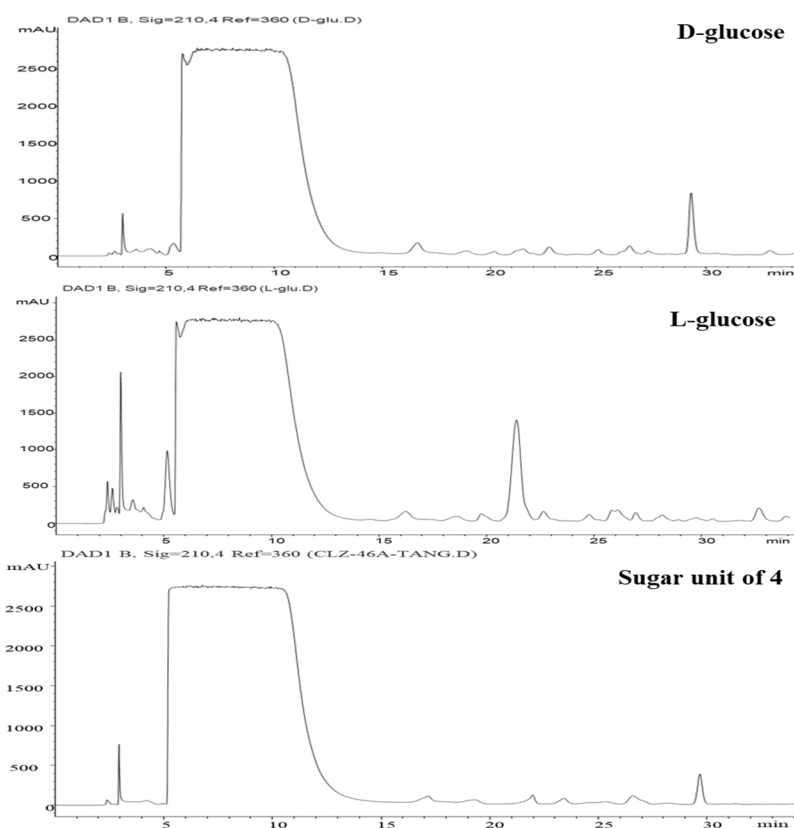

**Figure S40.** HPLC-UV (210 nm) chromatograms of the derivatives of D-glucose, L-glucose, and the sugar units of claulenoside A (**4**).

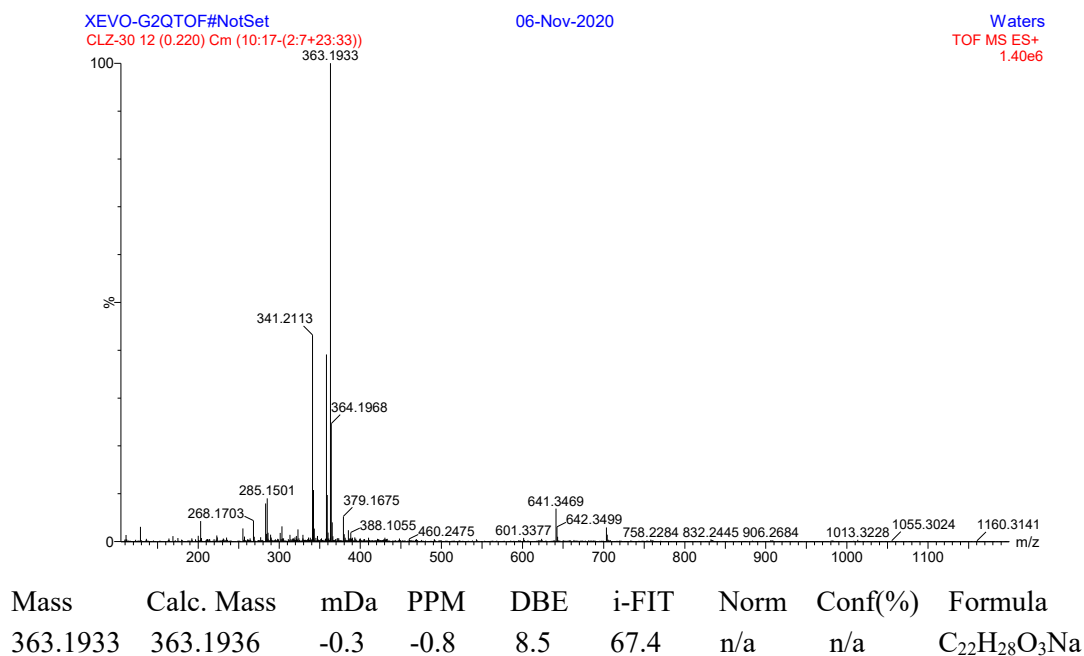

**Figure S41.** HR-ESI-MS of **5**.



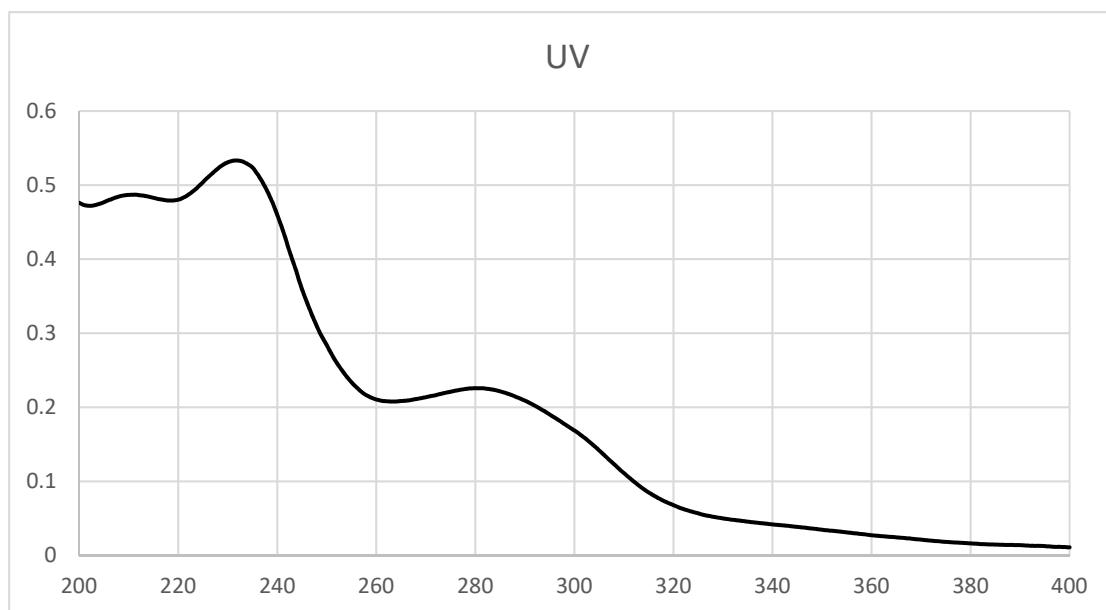

**Figure S42.** UV spectrum of **5** in MeOH.

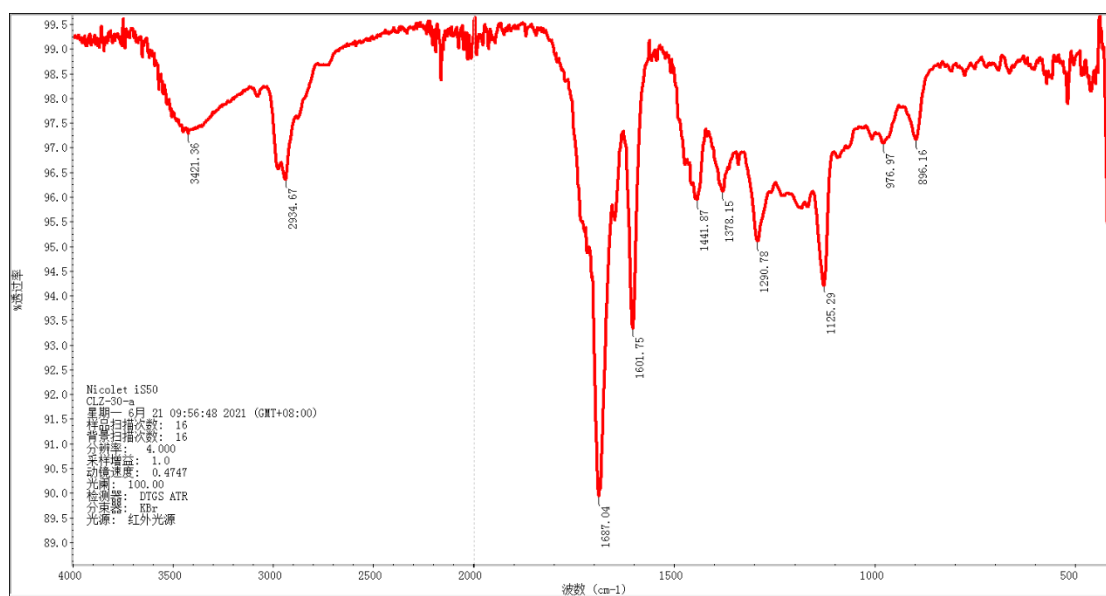

**Figure S43.** IR spectrum of **5**.

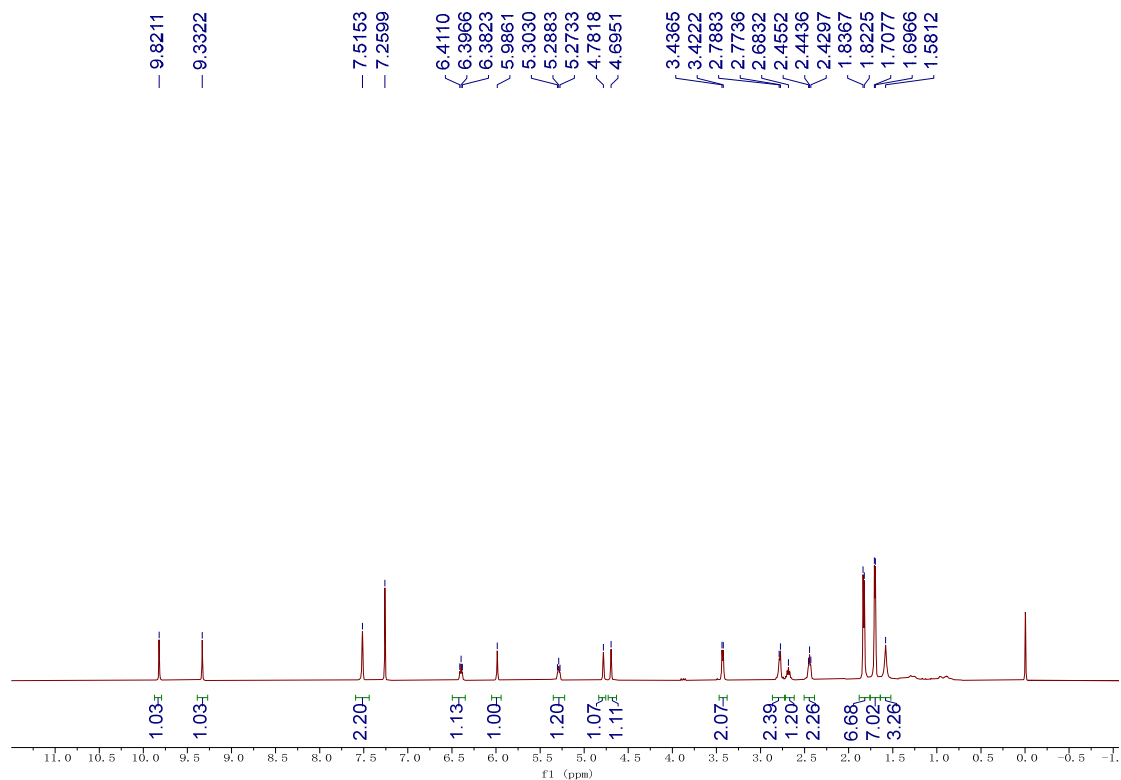

**Figure S44.** <sup>1</sup>H NMR (500 MHz) spectrum of **5** in CDCl<sub>3</sub>.

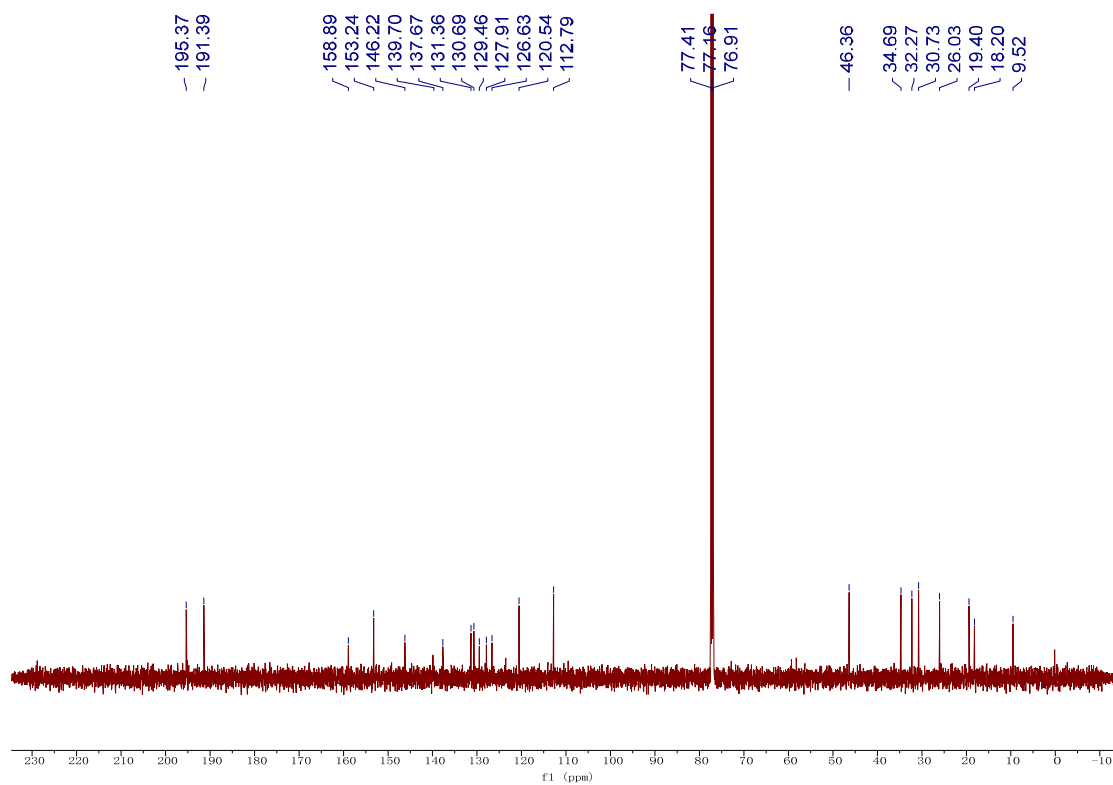

**Figure S45.** <sup>13</sup>C NMR (125 MHz) spectrum of **5** in CDCl<sub>3</sub>.

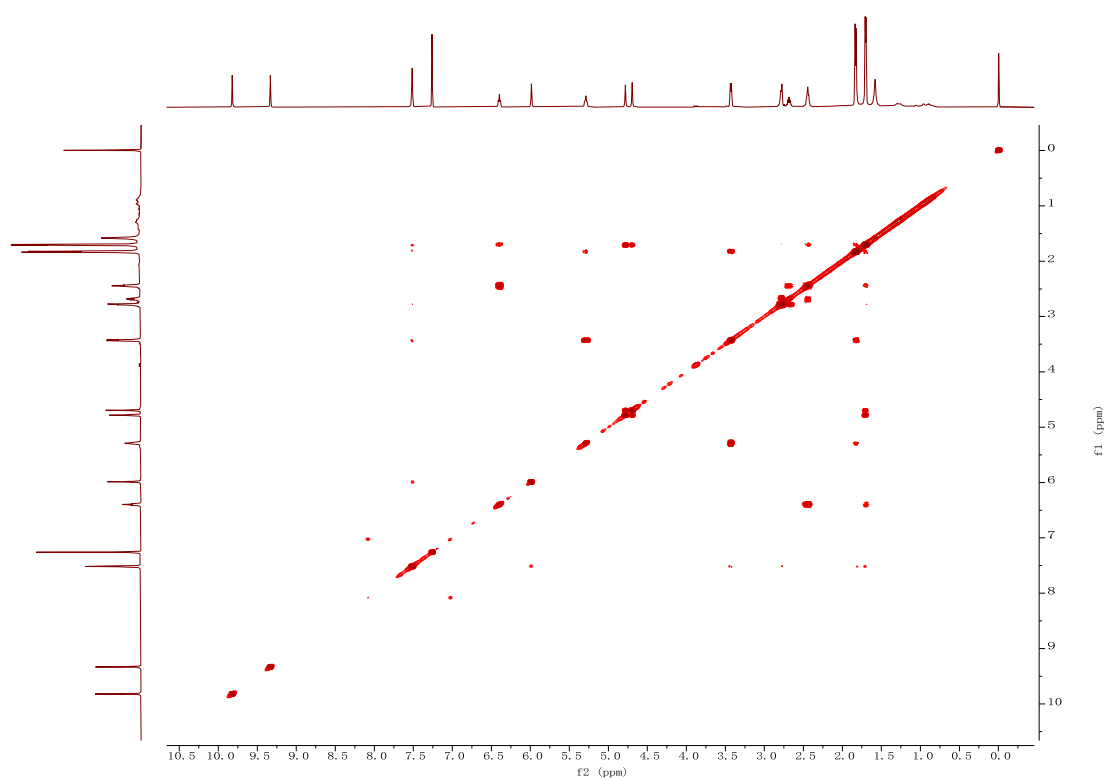

**Figure S46.**  $^1\text{H}$ - $^1\text{H}$  COSY (500 MHz) spectrum of **5** in  $\text{CDCl}_3$ .

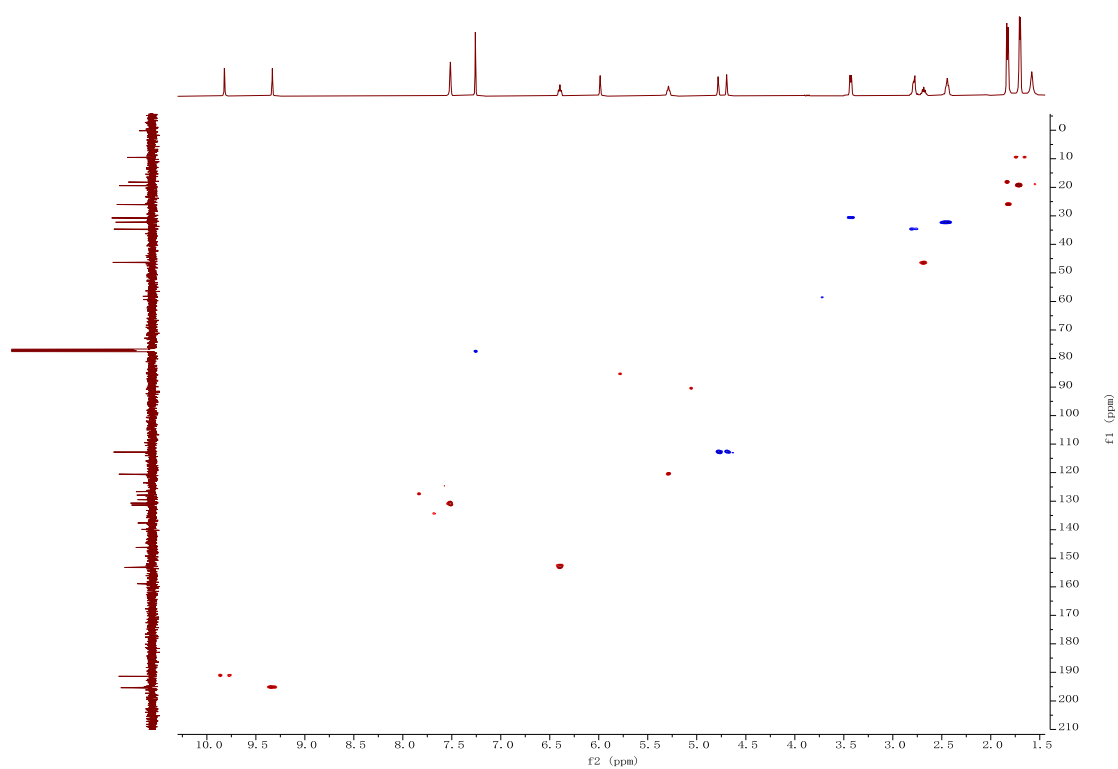

**Figure S47.** HSQC (500 MHz) spectrum of **5** in  $\text{CDCl}_3$ .

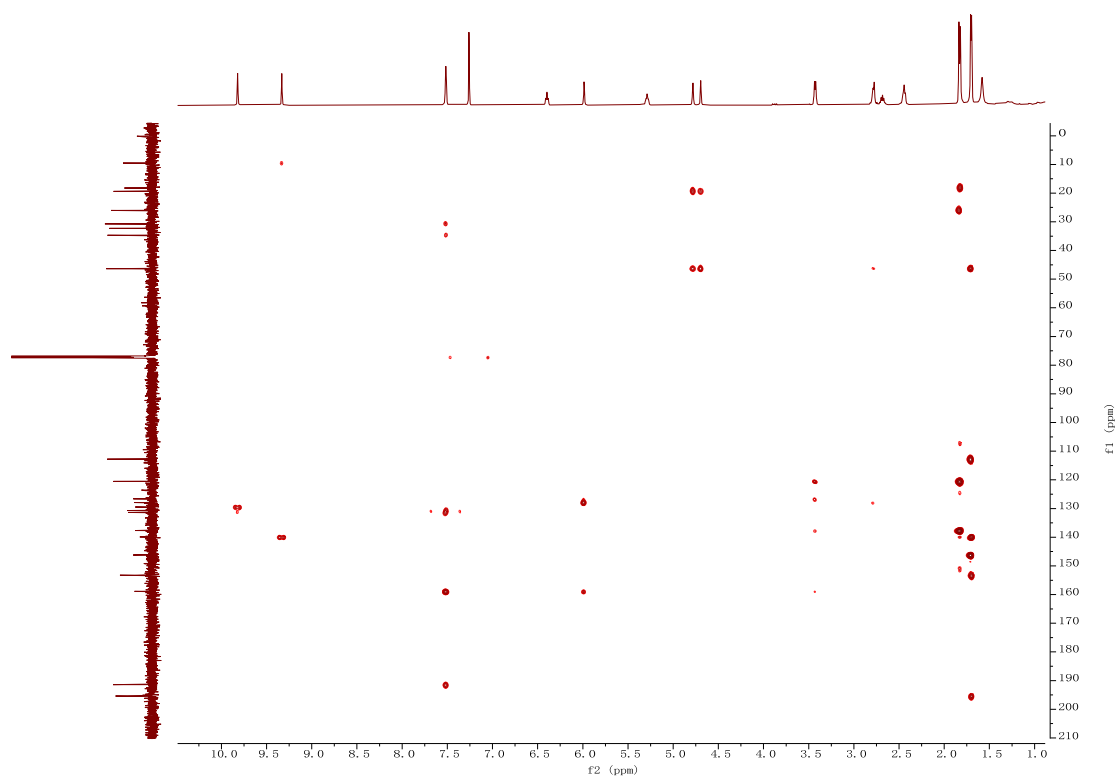

**Figure S48.** HMBC (500 MHz) spectrum of **5** in  $\text{CDCl}_3$ .

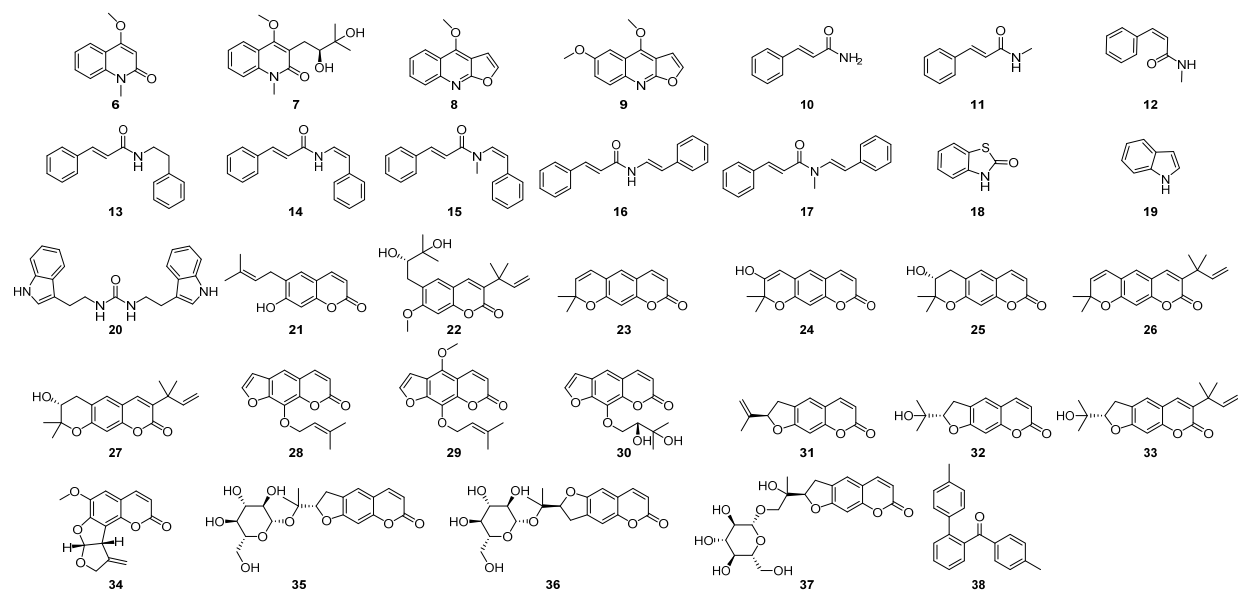

**Figure S49.** Chemical structures of compounds **6**–**38**.

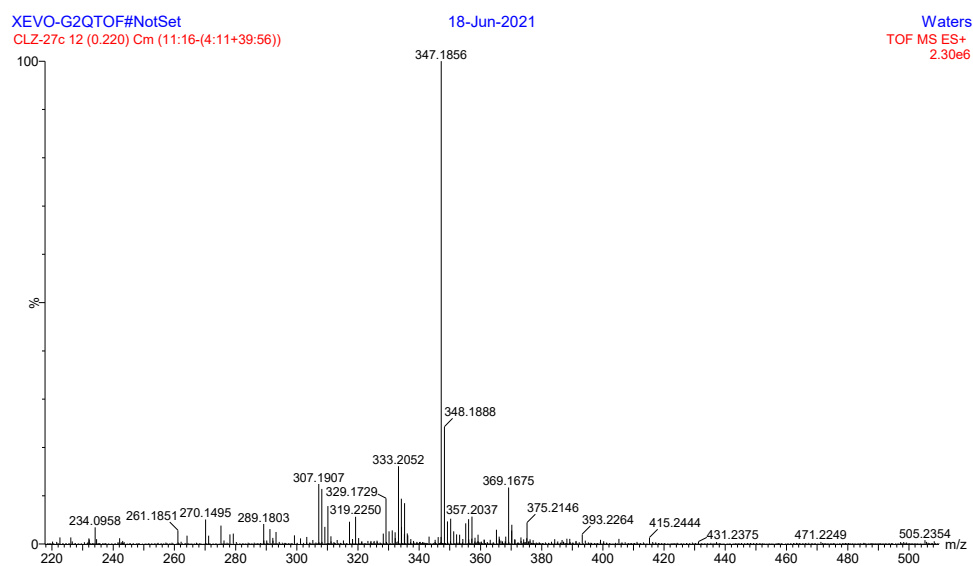

Figure S50. ESI-MS of **22**.

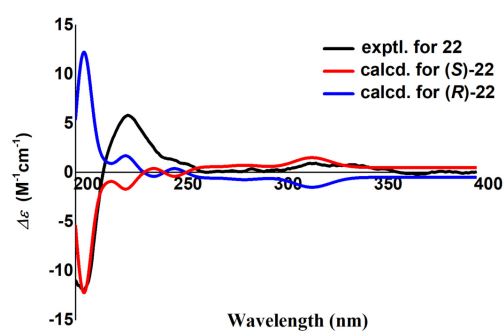

Figure S51. Experimental and calculated ECD spectra of **22**.
